# Supplementary material for: Lint‐O cooperates with L(3)mbt in target gene suppression to maintain homeostasis in fly ovary and brain
Source: PubMed Central journal article supplement (PMC9535798; doi:10.15252/embr.202153813), 2022-08-22
Supplement: EMBR-23-e53813-s002.pdf [file EMBR-23-e53813-s002.pdf]

## Expanded View Figures

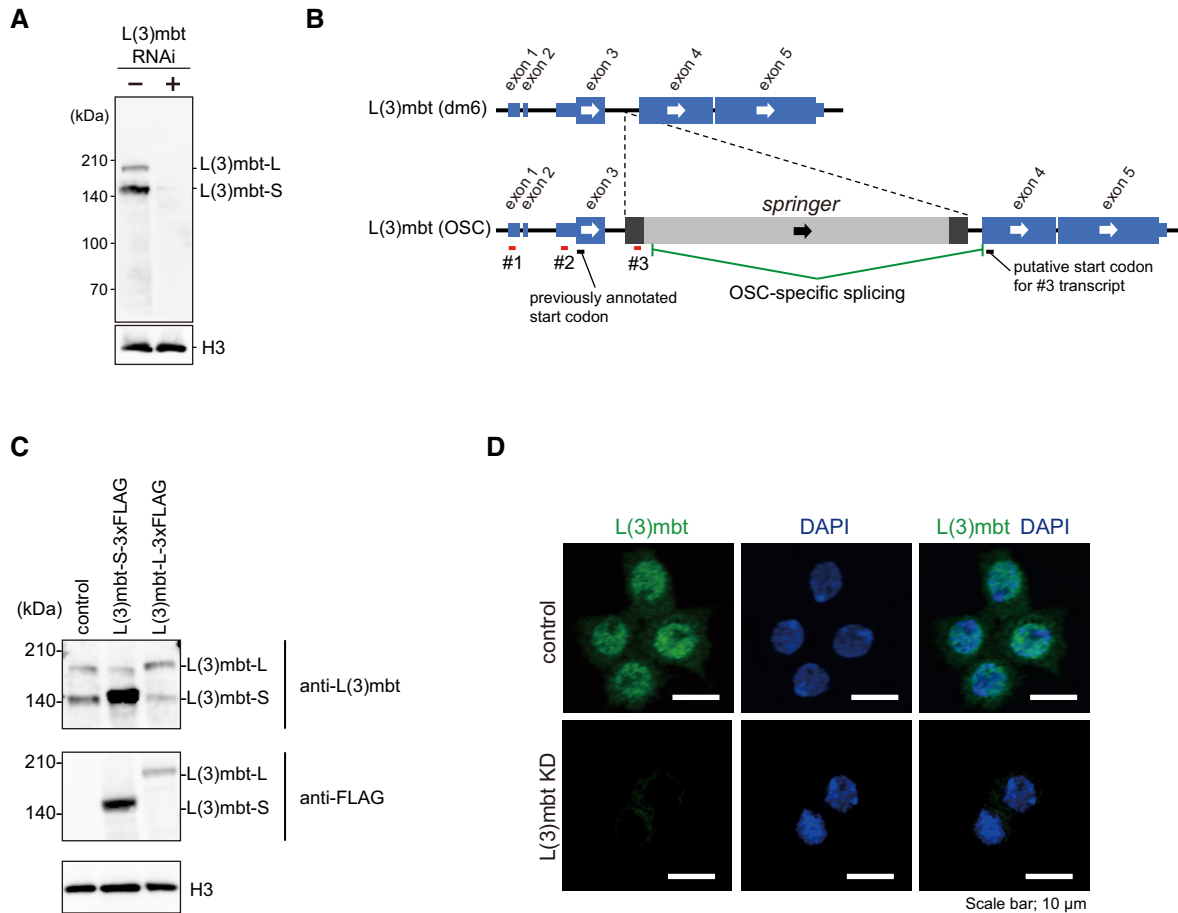

**Figure EV1. Two isoforms of L(3)mbt, L(3)mbt-L, and L(3)mbt-S, in OSCs.**

- A Western blotting using an anti-L(3)mbt antibody that we raised in this study detected L(3)mbt as a doublet in the OSC nuclear lysates. The doublet disappeared upon L(3)mbt RNAi. Histone H3 (H3) served as a loading control.
- B The exon-intron structures of the *l(3)mbt* gene in dm6 (provided by UCSC) and in OSCs (Sienski et al, 2012). Note that the *l(3)mbt* gene in OSCs has an LTR-type transposon, *springer*. RACE detected three different 5' ends of *l(3)mbt* mRNA (#1, #2, and #3).
- C Top: Western blotting using the anti-L(3)mbt antibody shows that L(3)mbt-L-3xFLAG and L(3)mbt-S-3xFLAG exogenously expressed in OSCs co-migrate with endogenous L(3)mbt-L and L(3)mbt-S (control), respectively. Middle: Western blotting was performed using anti-FLAG antibody. Bottom: Histone H3 (H3) was detected as a loading control.
- D Immunofluorescence analysis using the anti-L(3)mbt antibody detected L(3)mbt (green) mostly in the OSC nuclei. The L(3)mbt signals disappeared upon L(3)mbt RNAi (KD). DAPI (blue) indicates the nuclei. Scale bar: 10  $\mu$ m.

Source data are available online for this figure.

**Figure EV2. Genomic distribution of L(3)mbt and the effects of L(3)mbt loss on the expression levels of piRNA factors in OSCs.**

- A Genomic browser views of L(3)mbt ChIP-seq signals. All fly chromosomes are shown. The *vasa*, *ago3*, and *aub* loci are indicated. The total number of L(3)mbt ChIP peaks is shown in upper right.
- B PCA shows the correlation in the RNA-seq libraries. Control: GFP siRNA was used.
- C–E The genomic regions harboring *qin*, *tej*, *boot*, and *CG9925* (C), *piwi*, *yb*, *armi*, and *zuc* (D), and *flam* (E).

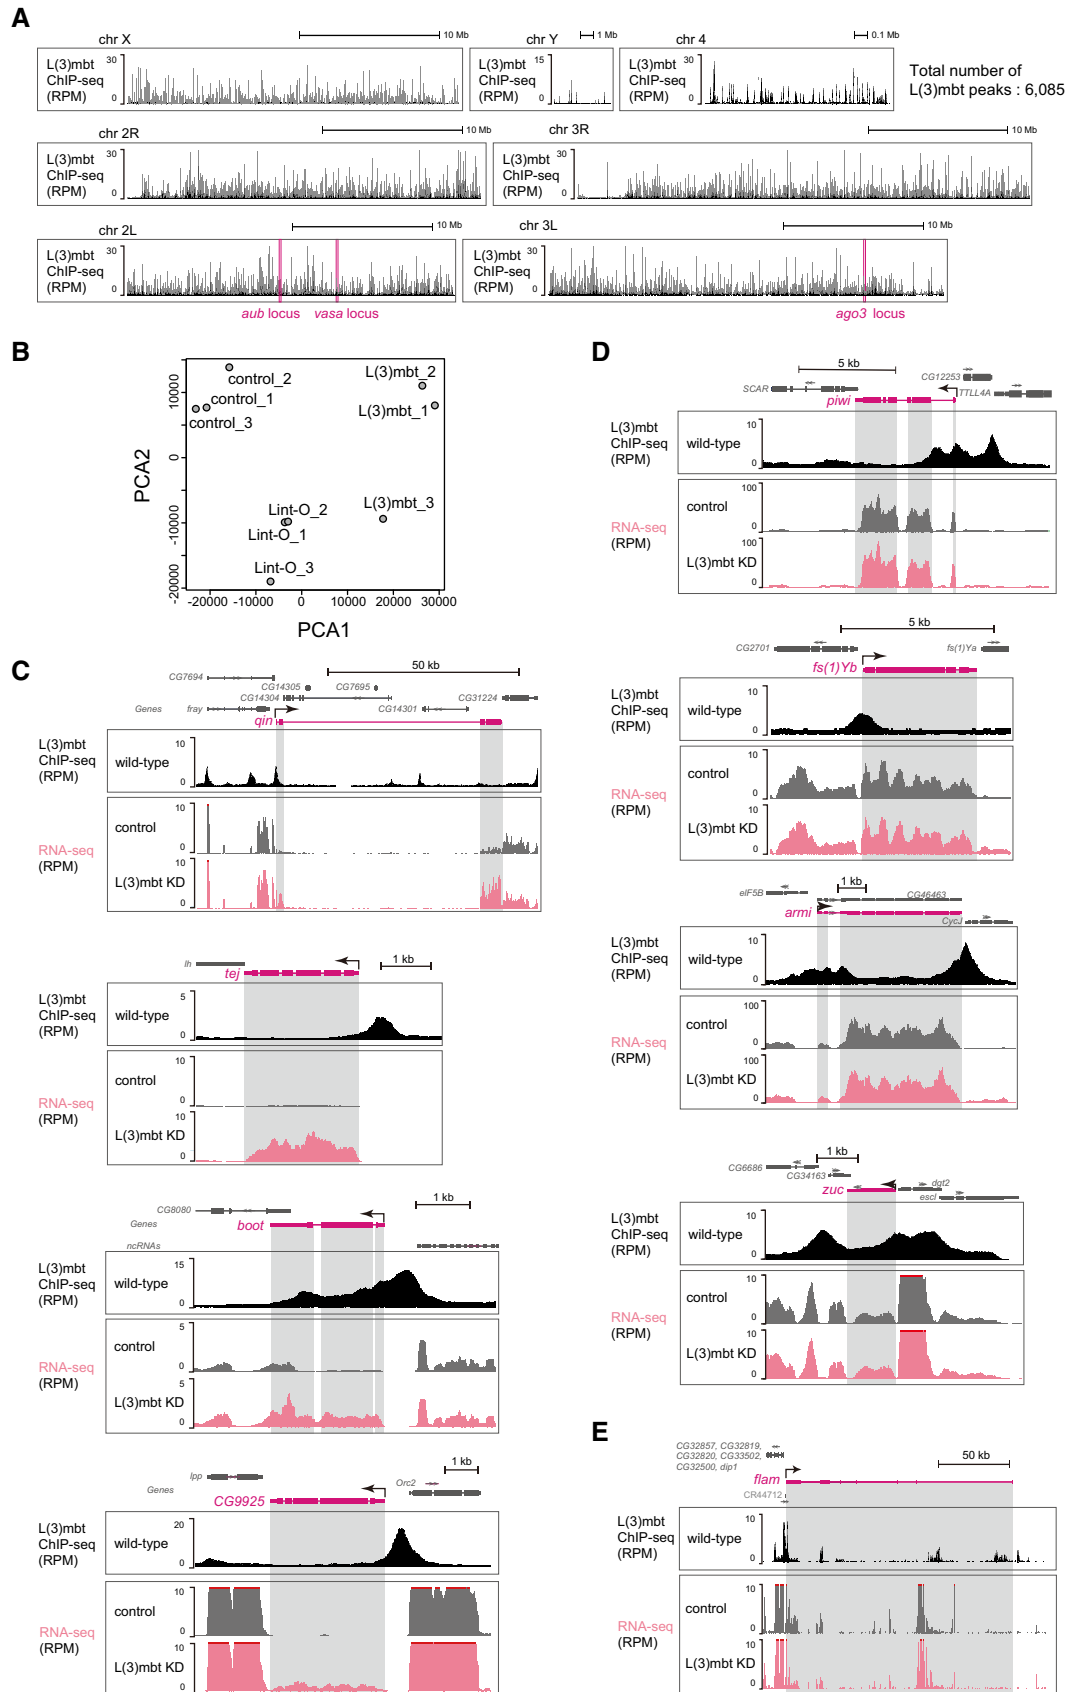

Figure EV2.

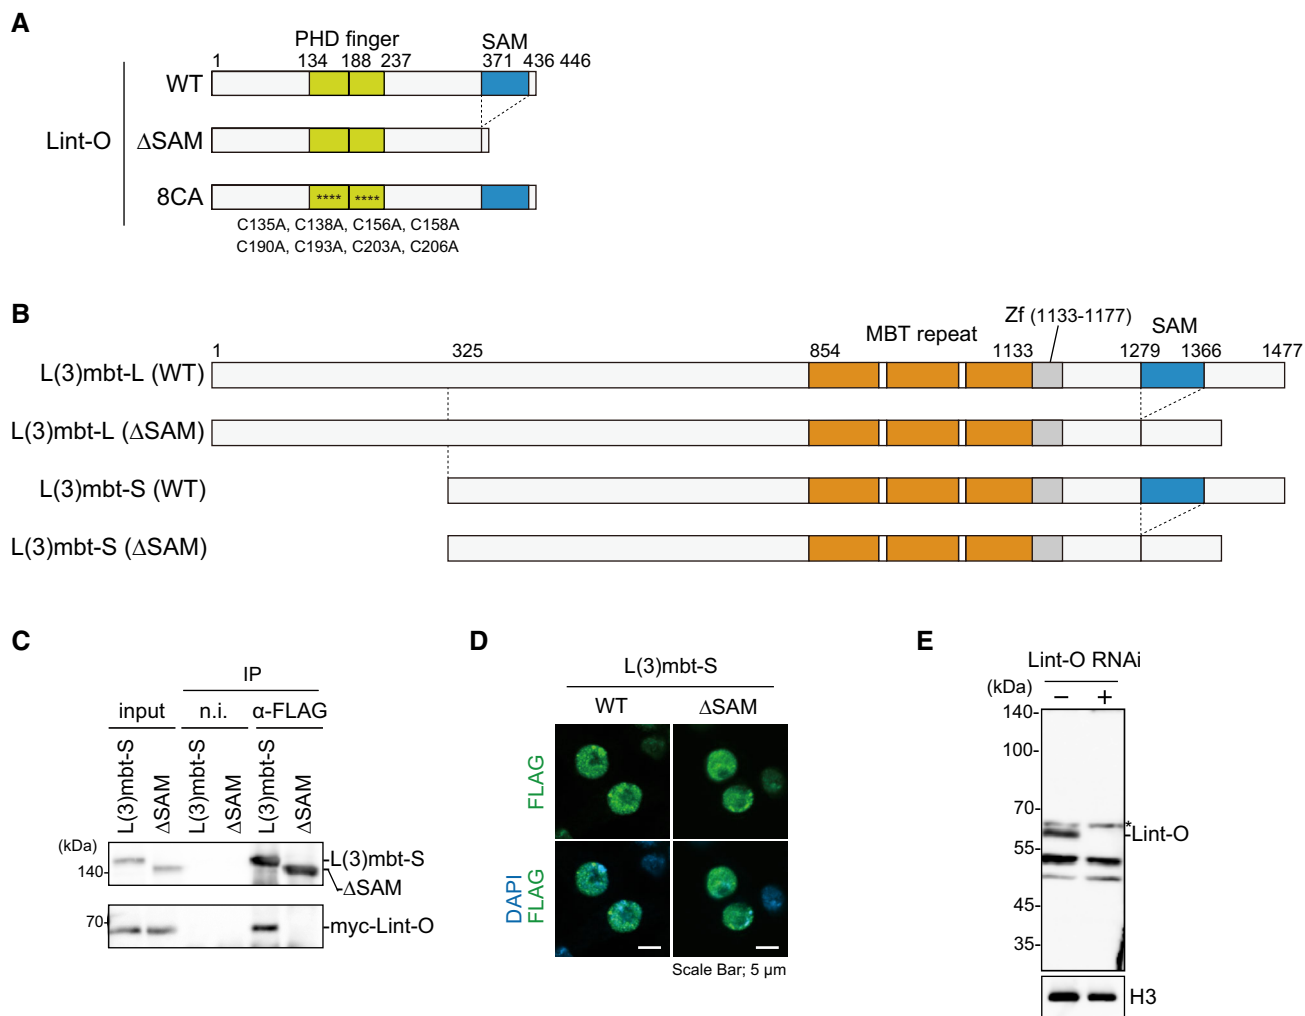

**Figure EV3. Domain structures of L(3)mbt, Lint-O and their mutants and behavior of L(3)mbt-S in OSCs.**

- A Domain structures of WT Lint-O and its  $\Delta$ SAM and 8CA mutants. The  $\Delta$ SAM mutant is composed of Met1-Val371 and Ser437-Asp446. The Cys-to-Ala mutations in the 8CA mutant are indicated at the bottom (asterisks in the structure).
- B Domain structures of WT L(3)mbt-L, WT L(3)mbt-S, and their  $\Delta$ SAM mutants. The  $\Delta$ SAM mutant of L(3)mbt-L is composed of Met1-Leu1278 and Val1367-Ser1477 of WT L(3)mbt-L. The  $\Delta$ SAM mutant of L(3)mbt-S is composed of Met325-Leu1278 and Val1367-Ser1477 of WT L(3)mbt-L.
- C IP/western blotting shows that WT L(3)mbt-S, but not its  $\Delta$ SAM mutant, co-immunoprecipitated with Lint-O from the OSC lysates. n.i., nonimmune IgG.
- D Subcellular localization of WT L(3)mbt-S and its  $\Delta$ SAM mutant (green). Scale bar: 5  $\mu$ m.
- E Western blotting using the anti-Lint-O antibodies raised in this study. The Lint-O band (~60 kDa) was observed in normal OSCs (Lint-O RNAi<sup>-</sup>) but not in Lint-O-depleted OSCs (Lint-O RNAi<sup>+</sup>). Histone H3 (H3) was detected as a loading control. An asterisk shows the background.

Source data are available online for this figure.

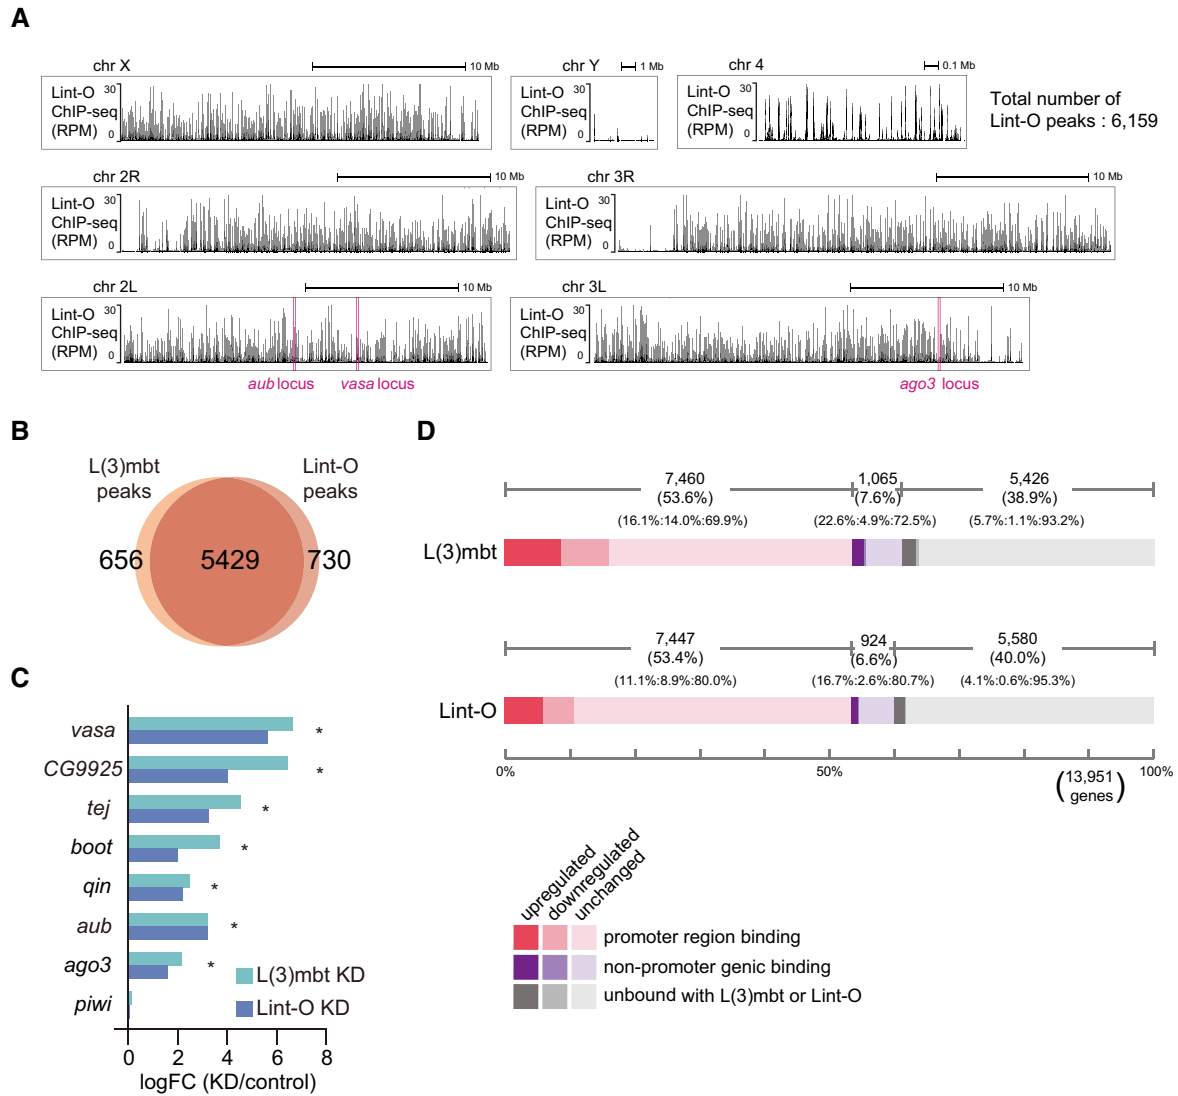

**Figure EV4. Lint-O OSC ChIP-seq and RNA-seq before and after Lint-O depletion in OSCs.**

- A Genomic browser views of the Lint-O ChIP-seq reads. All fly chromosomes are shown. The y-axis shows the number of RPM. The *vasa*, *ago3*, and *aub* loci are indicated. The total number of Lint-O ChIP peaks is shown in upper right.
- B Overlap between Lint-O ChIP peaks (A) and L(3)mbt ChIP peaks (Fig EV2A).
- C *vasa*, *CG9925*, *tej*, *boot*, *qin*, *aub*, and *ago3* were identified as upregulated genes (\*  $q$ -value < 0.05) in RNA-seq analysis. The log fold change of the differential expression for each piRNA pathway gene was calculated based on the RNA-seq data from normal (control), L(3)mbt-depleted (KD), and Lint-O-depleted (KD) OSCs. The y-axis shows the ratio of the read counts between L(3)mbt- and Lint-O-depleted OSCs and the normal OSCs.
- D Overview and comparison of the gene classification in Figs 1A and 4A.

**Figure EV5. Lint-O<sup>KO</sup> ovaries and larval brains.**

- A Schema depicting the experiment. Eggs were transferred to 29°C after spawning at 25°C and incubated for 13 days. Ovaries were dissected from adult flies.
- B–E Confocal images of brains of *y w*, *Lint-O<sup>KO</sup>*, and *L(3)mbt<sup>ts2</sup>* larvae (grown at 29°C) for Orb (B), Fas3 (C), Spectrin (Spec) (D), and F-actin (E). *Lint-O<sup>KO</sup>* ovariole showed defects in follicle cell layer integrity. DAPI (blue): nuclei. Scale bars: 50 μm.
- F The *Lint-O-Venus* fly line (*y w Lint-O-Venus*) was generated using the CRISPR/Cas9 system. The Venus sequence was inserted before the stop codon of Lint-O. The Lint-O-Venus signal (green) was detected in the nucleus of both germ and follicle cells in the ovaries. Nuclei were stained with DAPI (blue). Wild-type (*y w*) was used as a negative control. Scale bars: 50 μm.
- G Confocal images of *y w*, *Lint-O<sup>KO</sup>*, and *L(3)mbt<sup>ts2</sup>* immunostained for Vasa (magenta) and MIRA (green). Merged images were also presented in Fig 6B. Scale bars: 100 μm.
- H Enlarged views of insets in (G). Scale bars: 50 μm.
- I Confocal images of *y w*, *Lint-O<sup>KO</sup>*, and *L(3)mbt<sup>ts2</sup>* immunostained for Vasa (magenta) and ELAV (green). Merged images were also presented in Fig 6B. Scale bars: 100 μm.
- J Enlarged views of insets in (I). Scale bars: 100 μm.

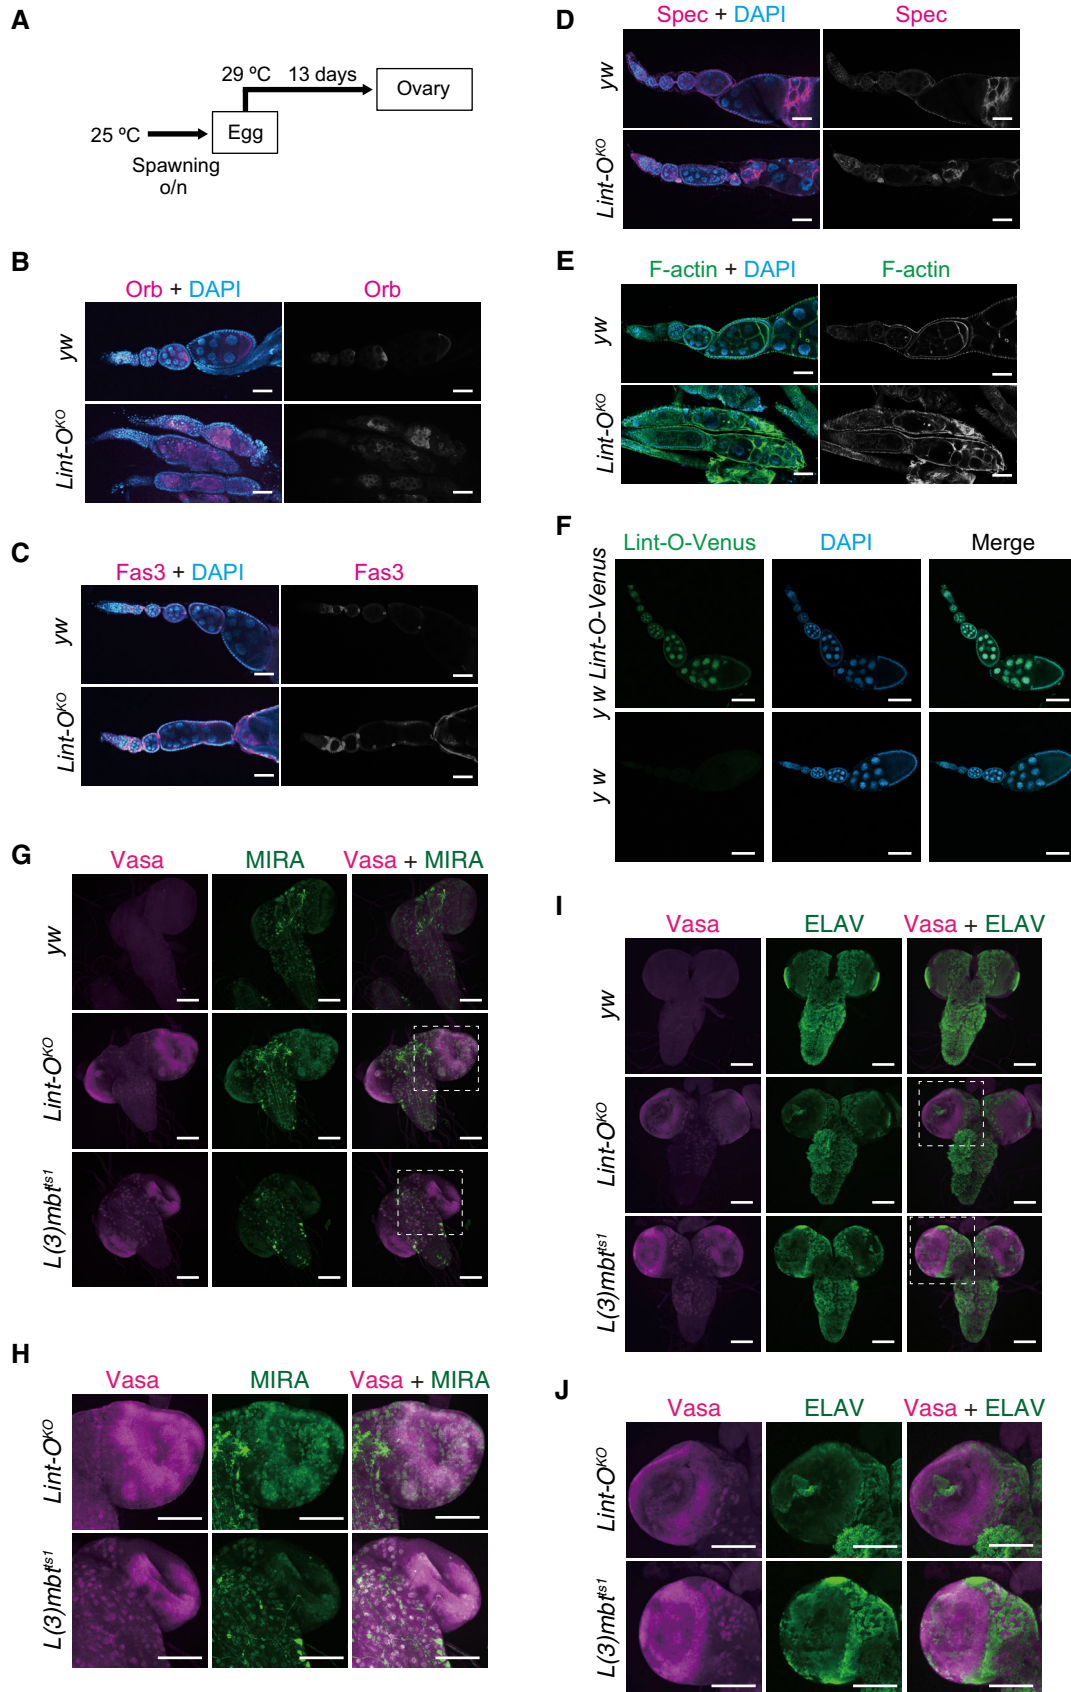

Figure EV5.
