# Supplementary material for: Lint‐O cooperates with L(3)mbt in target gene suppression to maintain homeostasis in fly ovary and brain
Source: PubMed Central journal article supplement (PMC9535798; doi:10.15252/embr.202153813), 2022-08-22
Supplement: EMBR-23-e53813-s008.pdf [file EMBR-23-e53813-s008.pdf]

## Appendix PDF

### Table of Contents

|                           |                                                                                                  |          |
|---------------------------|--------------------------------------------------------------------------------------------------|----------|
| <b>Appendix Figure S1</b> | Relationship between L(3)mbt ChIP peaks and TSS                                                  | ..... 2  |
| <b>Appendix Figure S2</b> | The mRNA levels of <i>AGO3</i> and <i>piwi</i> upon the depletion of L(3)mbt interactors in OSCs | ..... 3  |
| <b>Appendix Figure S3</b> | Genes bound and controlled by Lint-O                                                             | ..... 4  |
| <b>Appendix Table S1</b>  | List of proteins in LC-MS/MS analysis                                                            | ..... 5  |
| <b>Appendix Table S2</b>  | List of siRNAs and primers                                                                       | ..... 6  |
| <b>Appendix Table S3</b>  | List of genes differentially expressed in L(3)mbt KD OSC or Lint-O KD OSC                        | ..... 9  |
| <b>Appendix Table S4</b>  | List of fly strains                                                                              | ..... 16 |

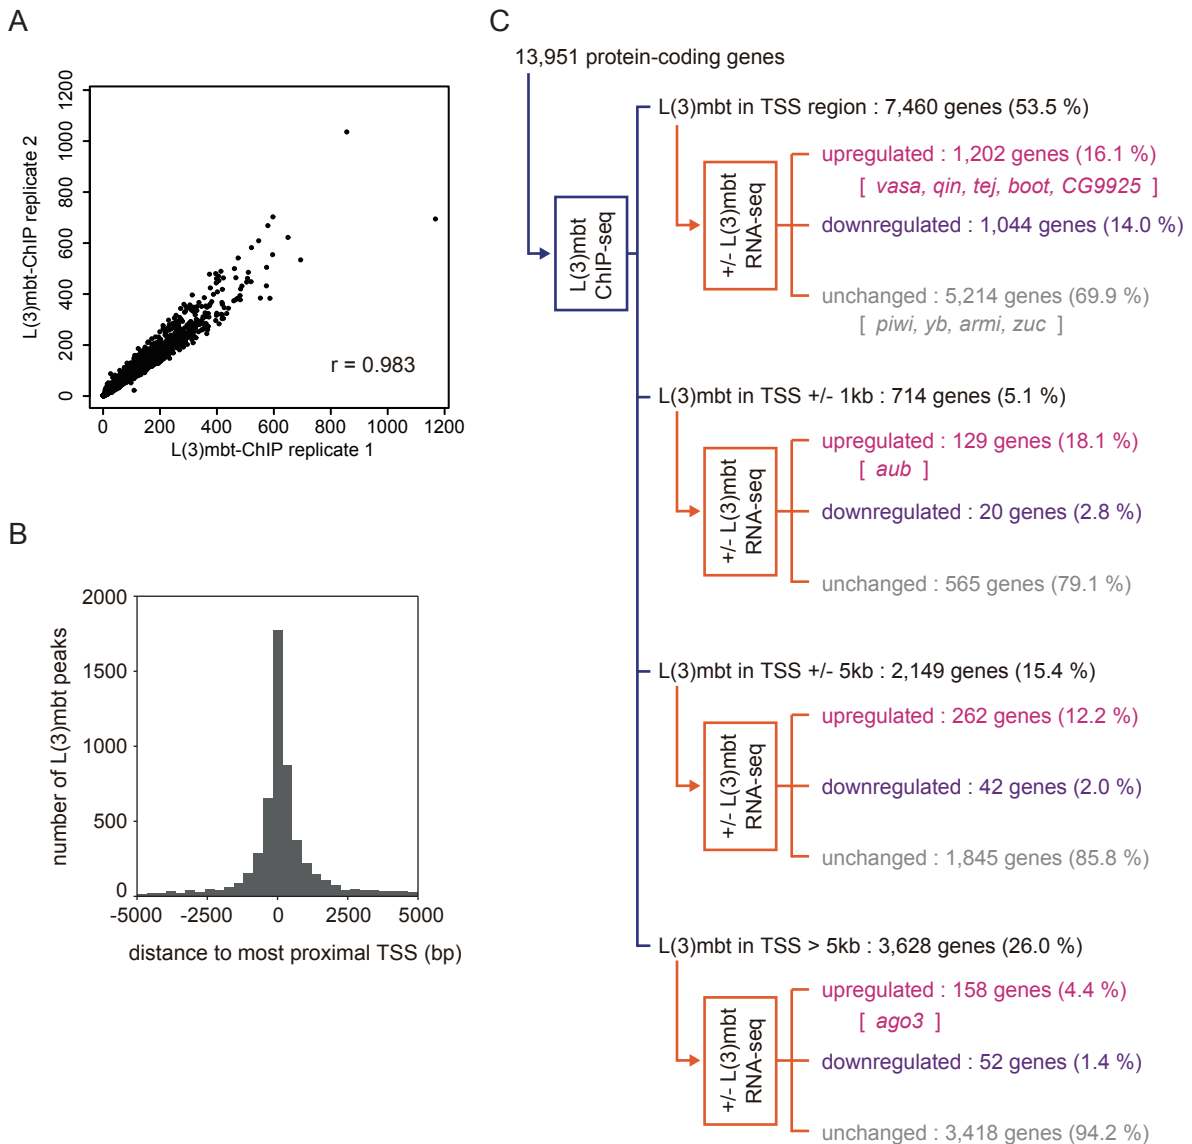

### Appendix Figure S1. Relationship between L(3)mbt ChIP peaks and TSS.

(A) Scatter plot of sequenced reads, mapped onto each L(3)mbt ChIP peak defined by MACS2 for each replicate. Each dot denotes a detected ChIP peak. (B) Distribution of L(3)mbt ChIP peaks is shown according to the distance to most proximal TSS. (C) The 13,951 protein-coding genes of *Drosophila* were classified into “L(3)mbt in TSS region,” “L(3)mbt in TSS +/- 1kb,” “L(3)mbt in TSS +/- 5kb,” and “L(3)mbt in TSS > 5kb,” in accordance with the L(3)mbt ChIP-seq signals, and were subsequently divided into “upregulated,” “downregulated,” and “unchanged” in accordance with the RNA-seq reads from OSCs before and after L(3)mbt depletion [+/- L(3)mbt]. Representatives of piRNA factors are indicated within the groups. Note that the “L(3)mbt in TSS region” corresponds to the “promoter region binding” in Fig 1A.

A

|                            |                                                      |
|----------------------------|------------------------------------------------------|
| L(3)mbt-containing complex | components                                           |
| LINT                       | L(3)mbt, Lint-1, CoRest                              |
| dREAM/MMB                  | L(3)mbt, Myb, E2F2, RBF, p53, Mip120, Mip130, Mip140 |

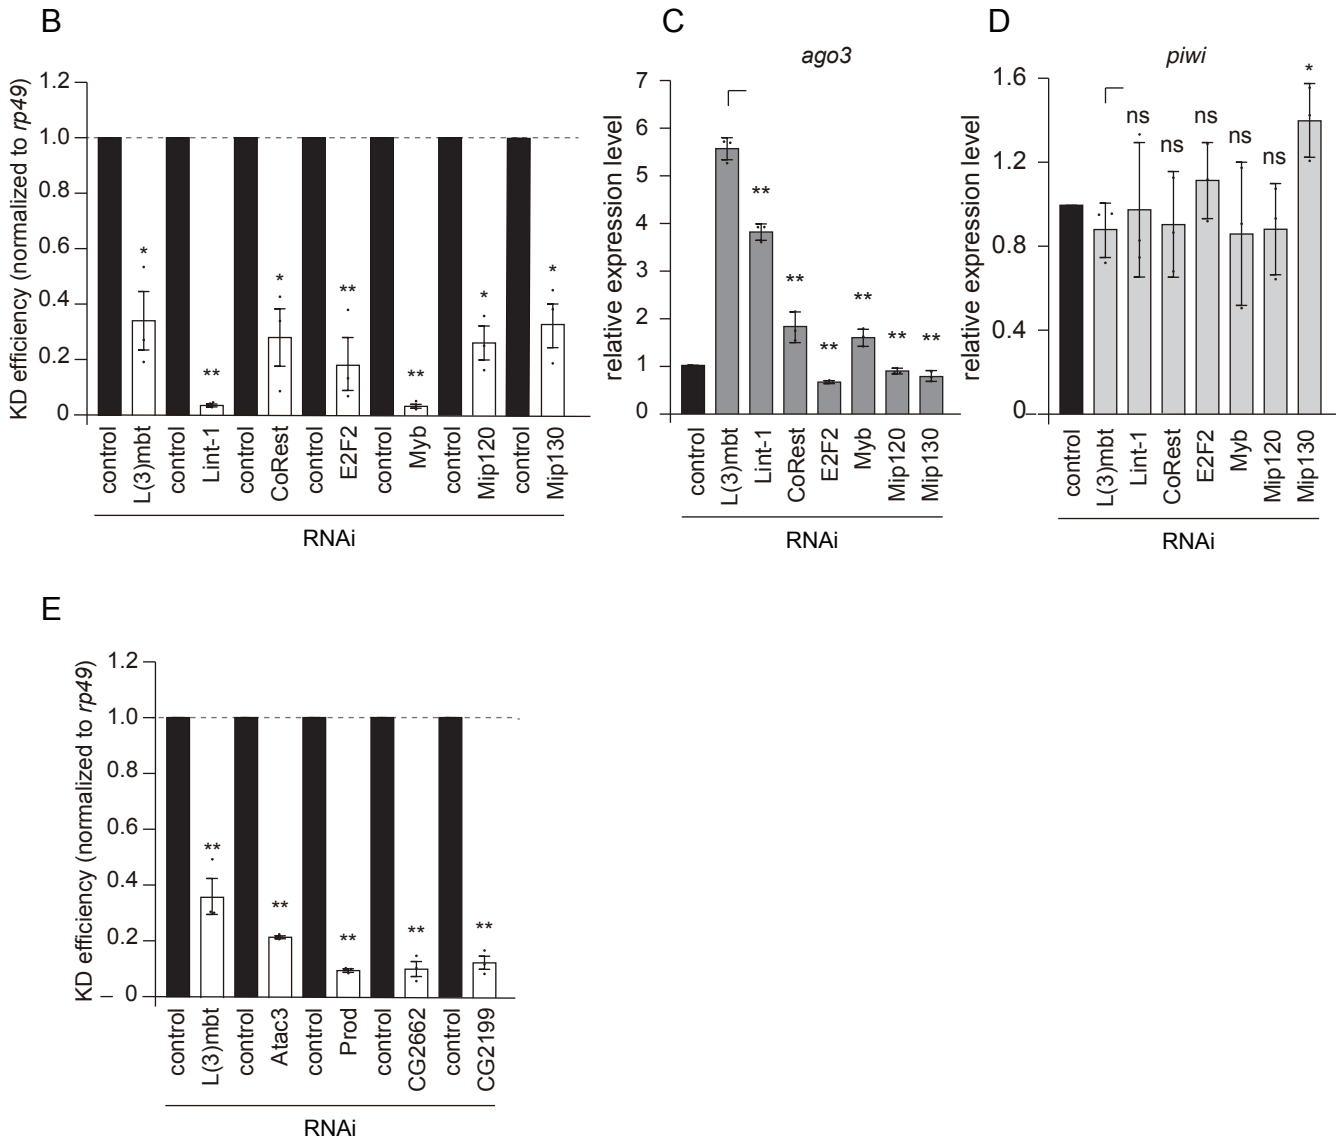

**Appendix Figure S2. The mRNA levels of *ago3* and *piwi* upon the depletion of L(3)mbt interactors in OSCs.**

(A) Known L(3)mbt cofactors within the LINT and dREAM complexes (Lewis et al. 2004; Meier et al. 2012; Blanchard et al, 2014). (B) Knockdown (KD) efficiencies of members of the LINT and dREAM complexes were verified by RT-qPCR. Control: EGFP siRNA was used. Data represent the mean  $\pm$  SE (n = 3). The *p* values were calculated with the t-test. \**p*: < 0.05, \*\**p*: < 0.01. (C, D) The mRNA levels of *ago3* (C) and *piwi* (D) were quantified in L(3)mbt-, Lint-1-, CoRest-, E2F2-, Myb-, Mip120-, and Mip130-depleted (RNAi) OSCs, and were compared with those in normal (control) OSCs. (E) KD efficiencies were verified by RT-qPCR for the indicated genes.

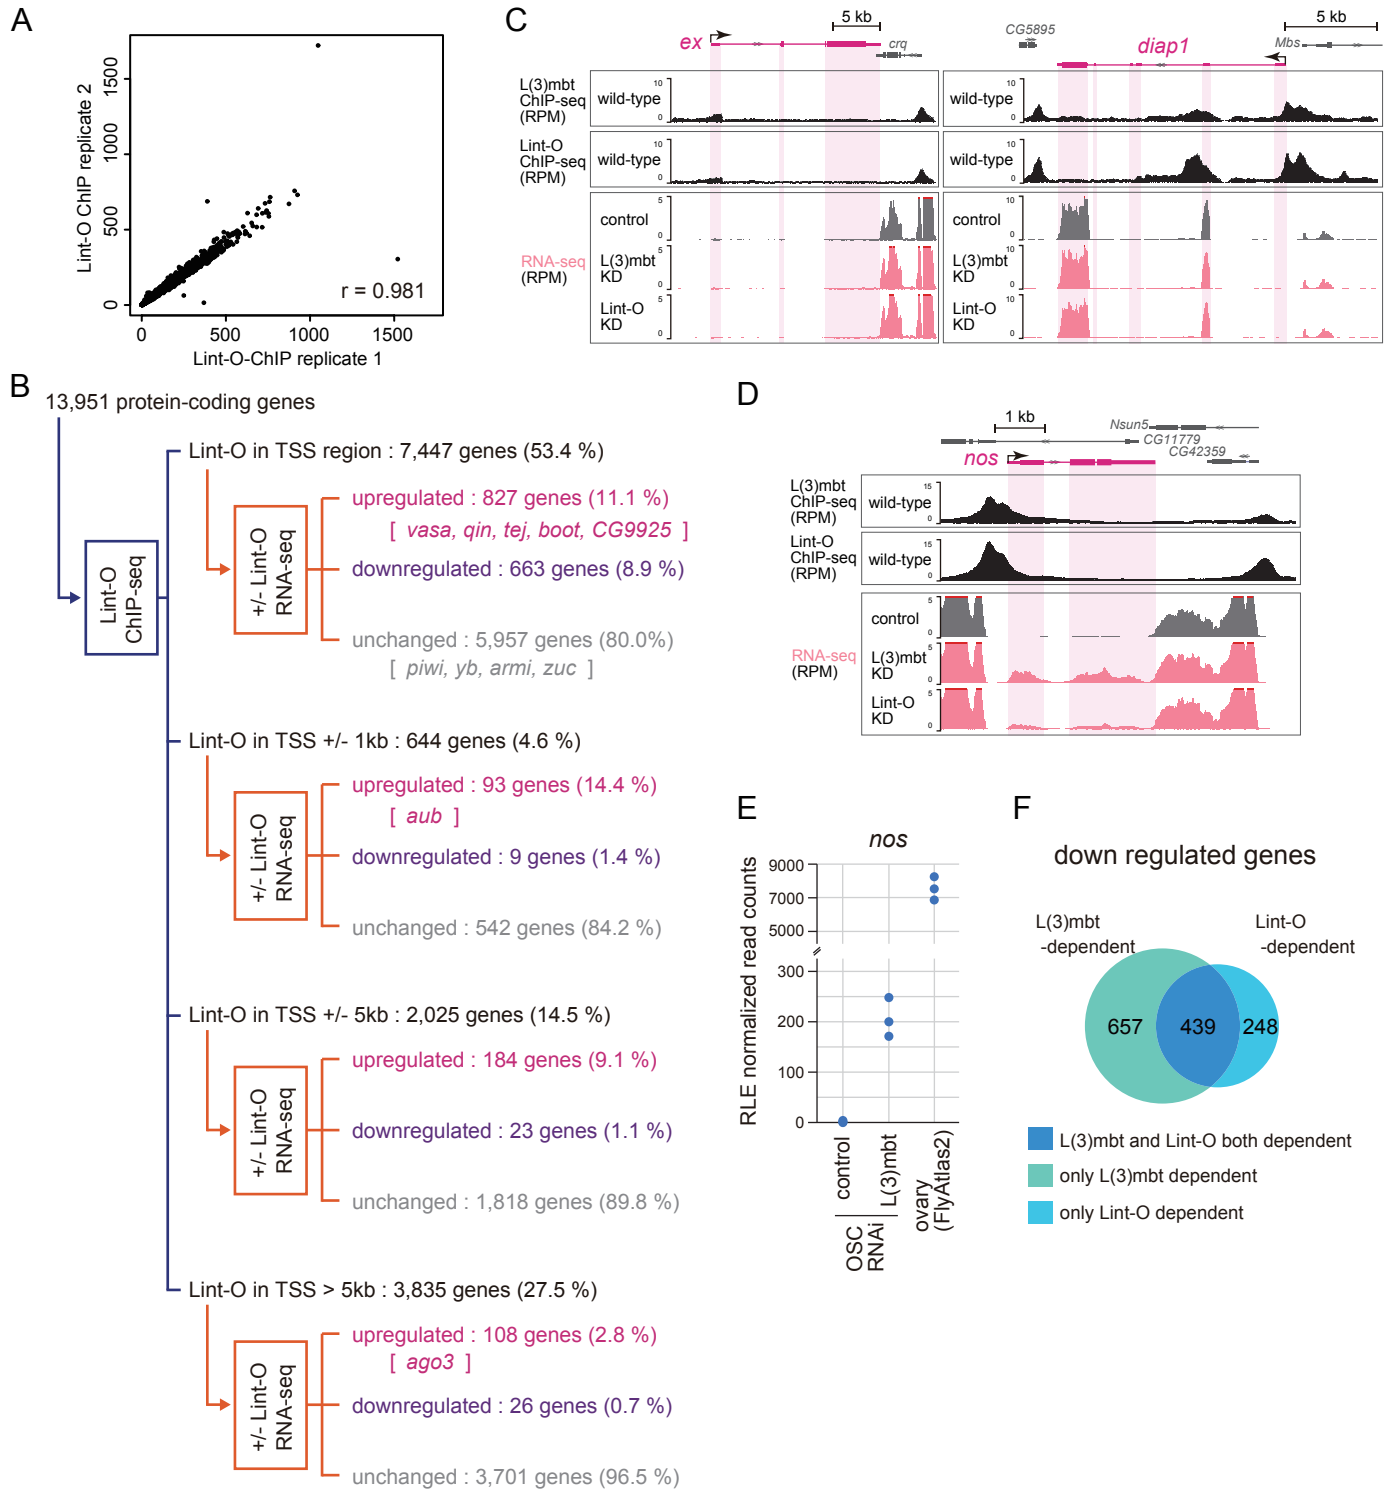

### Appendix Figure S3. Genes bound and controlled by Lint-O.

(A) Scatter plot of sequenced reads, mapped onto each Lint-O ChIP peak defined by MACS2 for each replicate. Each dot denotes a detected ChIP peak. (B) The 13,951 protein-coding genes of *Drosophila* were classified into “Lint-O in TSS region,” “Lint-O in TSS +/- 1kb,” “Lint-O in TSS +/- 5kb,” and “Lint-O in TSS > 5kb,” in accordance with the Lint-O ChIP-seq reads, and were subsequently divided into “upregulated,” “downregulated,” and “unchanged” in accordance with the RNA-seq reads from OSCs before and after Lint-O depletion [+/- Lint-O]. Representatives of piRNA factors are indicated within the groups. Note that the “Lint-O in TSS region” corresponds to the “promoter region binding” in Fig 4A. (C, D) The genomic regions harboring the *diap1* (C), *ex* (C), and *nos* (D) genes. The L(3)mbt and Lint-O ChIP-seq reads in normal OSCs (wild-type) and RNA-seq reads from L(3)mbt- and Lint-O-depleted [L(3)mbt KD and Lint-O KD] and control OSCs are shown. The shades in gray correspond to exons. The y-axis shows the number of RPM. (E) The levels of *nos* mRNA in the ovary and cultured OSCs following L(3)mbt depletion are shown. (F) Venn diagram shows that 439 protein-coding genes are commonly present in the l(3)mbt and lint-O libraries as downregulated genes.

Appendix Table S1. List of proteins in LC/MS/MS analysis.

excluded in first selection, excluded in second selection, excluded in third selection, and final selected proteins

| Accession  | Description      | Sum PEP Score | PSMs | Abundances (control) |       | Abundances (L3)mbt KD) |       | FC of (abundances) |
|------------|------------------|---------------|------|----------------------|-------|------------------------|-------|--------------------|
|            |                  |               |      | 1                    | 2     | 1                      | 2     |                    |
| E8NH29     | LD46071p (Fra    | 92.506        | 778  | 128.5                | 50.4  | 91.6                   | 129.5 | 0.809136137        |
| Q9VZ22     | L3)mbt intera    | 37.046        | 54   | 326                  | 70.2  | 1.9                    | 1.9   | 104.2631579        |
| Q9VB52     | LD05287p OS=     | 23.163        | 17   | 381.4                | 18.6  | 0                      | 0     | ∞                  |
| E4NKN3     | GM13963p OS=     | 17.92         | 61   | 247.3                | 68.8  | 32.5                   | 51.5  | 3.763095238        |
| L0MQ04     | ATP synthase     | 18.843        | 25   | 39.2                 | 281.2 | 38.5                   | 41.1  | 4.025125628        |
| Q78866     | EG:100G10.6 p    | 14.463        | 14   | 383.8                | 14.2  | 0                      | 1.9   | 209.4738842        |
| Q9VLK1     | U3 small nucle   | 14.345        | 9    | 274.4                | 0     | 27.3                   | 98.3  | 2.184713376        |
| P56538     | Eukaryotic tra   | 12.677        | 17   | 38.8                 | 163.9 | 188.8                  | 8.6   | 1.026849037        |
| P29844     | Endoplasmic r    | 12.448        | 13   | 168.8                | 90.3  | 85.5                   | 55.4  | 1.838892832        |
| Q9VJD1     | Glucosidase 2    | 11.363        | 13   | 131.1                | 176.4 | 35.6                   | 56.9  | 3.324324324        |
| A0A0B4KHY6 | Ets at 97D_isc   | 10.881        | 7    | 164.5                | 94.6  | 107.7                  | 33.2  | 1.838892832        |
| Q0ZHI2     | L23A ribosoma    | 9.293         | 5    | 242.3                | 54.7  | 80.4                   | 22.7  | 2.880698351        |
| Q9VUZ0     | Translocon-as    | 8.169         | 15   | 38.8                 | 262.7 | 67.1                   | 31.4  | 3.060913706        |
| P17704     | 40S ribosomal    | 7.807         | 14   | 253                  | 52.9  | 41.8                   | 52.3  | 3.250797024        |
| D2NUK9     | Hoi-pollai_ isof | 7.659         | 18   | 174.1                | 161.8 | 21.2                   | 42.9  | 5.24024961         |
| A0A0B4LH50 | Actin 87E_ isof  | 7.612         | 18   | 3.1                  | 193.1 | 121.8                  | 82    | 0.962708538        |
| P55830     | 40S ribosomal    | 7.37          | 8    | 93.7                 | 223.6 | 28.3                   | 54.4  | 3.836759371        |
| M9NE89     | Lamin_ isofor    | 7.079         | 7    | 3.9                  | 214.1 | 68                     | 114   | 1.197802198        |
| P50887     | 60S ribosomal    | 6.947         | 51   | 146.9                | 95.5  | 127.6                  | 30    | 1.538071066        |
| C0HKA1     | 40S ribosomal    | 6.738         | 7    | 130                  | 136.5 | 103.4                  | 30.1  | 1.996254682        |
| Q06559     | 40S ribosomal    | 6.598         | 7    | 182.4                | 100.9 | 56.7                   | 60    | 2.427592117        |
| Q9VPQ2     | DnaJ homolog     | 5.88          | 14   | 90.7                 | 173   | 94.3                   | 42    | 1.934702861        |
| X2JF59     | Thioredoxin pe   | 4.989         | 8    | 0                    | 261.5 | 62                     | 76.5  | 1.888086643        |
| Q7JZ53     | CG4866 OS=D      | 4.883         | 1    | 218.1                | 0     | 181.9                  | 0     | 1.199010445        |
| Q9VGN9     | Probable ribos   | 4.666         | 2    | 205.6                | 0     | 194.4                  | 0     | 1.057613169        |
| P08736     | Elongation fac   | 4.588         | 12   | 39.6                 | 193.4 | 102.3                  | 64.8  | 1.394374626        |
| A0A023GQA5 | Lethal (2) 37C   | 4.276         | 2    | 0                    | 357.9 | 0                      | 42.1  | 8.501187646        |
| Q9VTP4     | 60S ribosomal    | 3.676         | 2    | 30.2                 | 270.2 | 85.3                   | 14.3  | 3.016064257        |
| A0A0B4K6N1 | 40S ribosomal    | 3.528         | 1    | 400                  | 0     | 0                      | 0     | ∞                  |
| P11147     | Heat shock 70    | 3.513         | 6    | 61.3                 | 218.8 | 0                      | 119.9 | 2.336113428        |
| E46222     | 60S ribosomal    | 3.448         | 2    | 400                  | 0     | 0                      | 0     | ∞                  |
| H0RNL4     | F117108p1 (Fra   | 3.391         | 2    | 327.7                | 0     | 72.3                   | 0     | 4.532503458        |
| B5RLJ9     | F102875p (Fra    | 2.925         | 1    | 0                    | 338.7 | 0                      | 61.3  | 5.525285481        |
| Q8ST16     | RE83401p OS=     | 2.831         | 1    | 400                  | 0     | 0                      | 0     | ∞                  |
| P13469     | DNA-binding p    | 2.563         | 1    | 0                    | 0     | 0                      | 0     | -                  |
| Q8T479     | AT12489p OS=     | 2.553         | 1    | 0                    | 331.4 | 0                      | 68.6  | 4.83090379         |
| A0A0F7J3E9 | MIP06027p1 O     | 2.524         | 2    | 225.9                | 53.4  | 90.1                   | 30.5  | 2.315920398        |
| Q9V597     | 60S ribosomal    | 2.51          | 1    | 195.5                | 0     | 204.5                  | 0     | 0.95599022         |
| P41374     | Eukaryotic tra   | 2.424         | 1    | 63.9                 | 259.1 | 0                      | 77    | 4.194805195        |
| A0A0B4KH25 | Histone H2A C    | 2.41          | 6    | 193.5                | 85.5  | 79.8                   | 41.2  | 2.305785124        |
| Q7KLW6     | LD06837p (Fra    | 2.318         | 1    | 0                    | 400   | 0                      | 0     | ∞                  |
| Q4V5X9     | IP07888p OS=I    | 2.316         | 3    | 287.3                | 0     | 112.7                  | 0     | 2.549245785        |
| A0A023T5E7 | GEO01108p1 C     | 2.224         | 2    | 123.8                | 114.4 | 86.7                   | 75.1  | 1.472187886        |
| P02283     | Histone H2B C    | 2.166         | 10   | 238                  | 41.1  | 75                     | 45.9  | 2.308519438        |
| Q97183     | GH07456p OS=     | 2.102         | 3    | 33.6                 | 305.3 | 19.7                   | 41.3  | 5.555737705        |
| A0A0B4LG52 | GEO08239p1 C     | 2.05          | 2    | 108.9                | 139.2 | 0                      | 152   | 1.632236842        |
| Q7JNE1     | Non-histone c    | 1.992         | 2    | 0                    | 346.7 | 0                      | 53.3  | 6.504890432        |
| Q08473     | RNA-binding p    | 1.98          | 3    | 68.2                 | 197.7 | 46.7                   | 87.4  | 1.98284862         |
| Q9VWD9     | LD38919p OS=     | 1.957         | 2    | 213                  | 187   | 0                      | 0     | ∞                  |
| Q6SV50     | 40S ribosomal    | 1.919         | 2    | 134.6                | 218.8 | 0                      | 48.8  | 7.230452675        |
| A8DY43     | Uncharacterize   | 1.858         | 2    | 0                    | 0     | 0                      | 0     | -                  |
| Q9VHG5     | Insulator bindi  | 1.854         | 11   | 87.5                 | 86.9  | 212.1                  | 13.6  | 0.772707133        |
| A9UN96     | LD25519p OS=     | 1.853         | 1    | 400                  | 0     | 0                      | 0     | ∞                  |
| P54397     | 39 kDa FK506     | 1.795         | 1    | 400                  | 0     | 0                      | 0     | ∞                  |
| P06603     | Tubulin alpha-   | 1.781         | 1    | 56.1                 | 0     | 343.9                  | 0     | 0.163128817        |
| Q7K5M2     | GH05836p OS=     | 1.748         | 2    | 88.3                 | 177.5 | 80.1                   | 54.1  | 1.980625931        |
| P09180     | 60S ribosomal    | 1.604         | 1    | 186.5                | 0     | 213.5                  | 0     | 0.8735363          |
| B7ZWP7     | RH14172p (Fra    | 1.601         | 1    | 91                   | 159.3 | 81.7                   | 68    | 1.672010688        |
| M9PFN1     | RuvB-like heli   | 1.576         | 2    | 12.3                 | 211.3 | 94.6                   | 81.9  | 1.266855524        |
| Q7KRI2     | Longitudinals I  | 1.34          | 1    | 16.7                 | 313.9 | 69.4                   | 0     | 4.763688761        |
| Q9VHX4     | LD24679p OS=     | 1.314         | 3    | 27.4                 | 127.3 | 134.1                  | 111.2 | 0.630656339        |
| Q8IR16     | No on or off tr  | 1.28          | 2    | 305.8                | 0     | 94.2                   | 0     | 3.246284501        |
| COHL66     | Histone H3.3A    | 1.259         | 2    | 400                  | 0     | 0                      | 0     | ∞                  |
| Q7K4B2     | CG7845_ isofor   | 1.259         | 1    | 0                    | 256.3 | 0                      | 143.7 | 1.783576896        |
| Q9VSW7     | LD21662p OS=     | 1.228         | 2    | 0                    | 355.3 | 0                      | 44.7  | 7.948545861        |
| Q9I7W5     | Something abo    | 1.154         | 1    | 400                  | 0     | 0                      | 0     | ∞                  |
| Q9VQ29     | Cytochrome b     | 1.145         | 1    | 0                    | 371.1 | 0                      | 28.9  | 12.84083045        |
| Q9V7A4     | Integrin alpha-  | 1.136         | 4    | 400                  | 0     | 0                      | 0     | ∞                  |
| A8DYH1     | Muscle wastec    | 1.073         | 14   | 22.8                 | 332.2 | 11.6                   | 33.4  | 7.888888889        |
| Q9V3P3     | LD45860p OS=     | 1.067         | 2    | 0                    | 341.5 | 0                      | 58.5  | 5.837606838        |
| Q9VA91     | 40S ribosomal    | 1.049         | 1    | 400                  | 0     | 0                      | 0     | ∞                  |
| A0A0B4LFD9 | GEO04460p1 C     | 1.044         | 1    | 364.3                | 0     | 35.7                   | 0     | 10.20448179        |
| A0A0B4KFV4 | Uncharacterize   | 1.037         | 2    | 12.3                 | 188.2 | 118.8                  | 80.7  | 1.005012531        |
| Q9VMT4     | GH15768p OS=     | 0.998         | 5    | 0                    | 0     | 400                    | 0     | 0                  |
| M9PDW8     | Uncharacterize   | 0.99          | 11   | 400                  | 0     | 0                      | 0     | ∞                  |
| I1V500     | Supercoiling fa  | 0.961         | 1    | 33.9                 | 294.2 | 71.9                   | 0     | 4.563282337        |
| Q9VVH5     | AT13736p OS=     | 0.947         | 1    | 266.9                | 0     | 133.1                  | 0     | 2.005259204        |
| A0A0B4KF15 | Mangetout_ iso   | 0.942         | 5    | 400                  | 0     | 0                      | 0     | ∞                  |
| M9NFF9     | Ada2a-contain    | 0.94          | 2    | 207.2                | 114.8 | 22.2                   | 55.8  | 4.128205128        |
| Q24156     | Transcription f  | 0.937         | 2    | 84.5                 | 56.9  | 232.6                  | 25.9  | 0.547001934        |
| Q94901     | RNA-binding p    | 0.919         | 1    | 400                  | 0     | 0                      | 0     | ∞                  |
| B7Z073     | SOSS complex     | 0.898         | 1    | 0                    | 400   | 0                      | 0     | ∞                  |
| J7K9E8     | Sin3A (Fragme    | 0.852         | 1    | 0                    | 35.2  | 0                      | 364.8 | 0.096491228        |
| Q5B131     | LD15043p OS=     | 0.839         | 2    | 0                    | 115.5 | 180                    | 104.5 | 0.405975395        |
| Q9VLP4     | Protein mitosh   | 0.838         | 1    | 400                  | 0     | 0                      | 0     | ∞                  |
| F0JAS9     | TD01073p (Fra    | 0.828         | 8    | 0                    | 0     | 400                    | 0     | 0                  |
| Q9VNA3     | GH21273p OS=     | 0.824         | 1    | 376.6                | 0     | 23.4                   | 0     | 16.09401709        |
| P26686     | Serine-arginin   | 0.815         | 1    | 400                  | 0     | 0                      | 0     | ∞                  |
| Q95U54     | GH08271p OS=     | 0.813         | 4    | 0                    | 0     | 400                    | 0     | 0                  |
| E1JHR0     | Drongo_ isoforr  | 0.764         | 1    | 0                    | 0     | 400                    | 0     | 0                  |
| Q967T6     | Gag protein OS   | 0.757         | 1    | 155.3                | 136.4 | 0                      | 108.3 | 2.693444137        |
| A1ZBL0     | Tubulin beta c   | 0.757         | 2    | 0                    | 196.1 | 0                      | 203.9 | 0.961745954        |
| M9Z4Q3     | MIP26177p1 O     | 0.754         | 1    | 0                    | 0     | 0                      | 0     | -                  |
| Q8MT08     | Dynein regulat   | 0.738         | 1    | 0                    | 400   | 0                      | 0     | ∞                  |
| Q59E37     | Uncharacterize   | 0.735         | 2    | 0                    | 0     | 400                    | 0     | 0                  |
| Q9W1R1     | GH10609p OS=     | 0.725         | 1    | 141.1                | 0     | 258.9                  | 0     | 0.544998069        |
| Q9VVN4     | ATR-interactir   | 0.719         | 1    | 0                    | 305.1 | 0                      | 94.9  | 3.214963119        |
| Q86PC1     | RE03224p OS=     | 0.68          | 1    | 0                    | 0     | 400                    | 0     | 0                  |
| P20007     | Phosphoenolpy    | 0.675         | 9    | 0                    | 0     | 400                    | 0     | 0                  |
| C6SUW3     | LD13662p OS=     | 0.644         | 1    | 0                    | 240.9 | 0                      | 159.1 | 1.514142049        |

**Appendix Table S2.** List of siRNAs and primers. RNA is shown in italics.

| <b>experiment</b>   | <b>name</b>                   | <b>sense</b>                       | <b>antisense</b>                   |
|---------------------|-------------------------------|------------------------------------|------------------------------------|
| RNAi in OSCs        | siEGFP                        | <i>GGCAAGCUGACCCUGAAGU</i> TT      | <i>ACUUCAGGGUCAGCUUGCC</i> TT      |
|                     | siL(3)mbt                     | <i>CCUCUGGAGAUGUCCGUAA</i> TT      | <i>UUACGGACAUCUCCAGAGG</i> TT      |
|                     | siLint-1                      | <i>GCAGAAUCUCCACCAGUAA</i> TT      | <i>UUACUGGUGGAGAUUCUGC</i> TT      |
|                     | siCoRest                      | <i>AACGAGGAGUCUGAUAACGAU</i> TT    | <i>AUCGUUAUCAGACUCCUCGUU</i> TT    |
|                     | siE2F2                        | <i>CCAAAUCUUGGACGUACA</i> TT       | <i>UGUACGUCCAAGAUUUUGG</i> TT      |
|                     | siMyb                         | <i>GGAGAACGACCAUUGCAU</i> TT       | <i>AUGGAAUGGUCGAUUCUCC</i> TT      |
|                     | siMip120                      | <i>GUCAUCUUUGUCCAGAAGU</i> TT      | <i>UAUGUGGACCACGUUCUUC</i> TT      |
|                     | siMip130                      | <i>GGACUCCGUUUCCAUGCUA</i> TT      | <i>UAGCAUGGAAACGGAGUCC</i> TT      |
|                     | siAtac3                       | <i>CGAAUGGAUGUCCUAGAAA</i> UU      | <i>UUUCUAGGACAUCAUUCG</i> UU       |
|                     | siProd                        | <i>CGAUUGGAAGAACCACU</i> UU        | <i>AGUGGUGUUCUCCAUCG</i> UU        |
|                     | siCG2662(siLint-O)            | <i>GAUUGAGAAGCUAGCCAAA</i> UU      | <i>UUUGGCUAGCUUCUCAAUC</i> UU      |
| siCG2199            | <i>CAGACGUACUGGAGACCAU</i> UU | <i>AUGGUCUCCAGUACGUCUG</i> UU      |                                    |
| <b>experiment</b>   | <b>name</b>                   | <b>forward primer (5' &gt; 3')</b> | <b>reverse primer (5' &gt; 3')</b> |
| RT-qPCR             | L(3)mbt                       | AGGAGACGTCTTTCGCTTGG               | AGGAGACGTCTTTCGCTTGG               |
|                     | Lint-1                        | CGCCTCAACGATAGCCTACA               | TATCACGAGCCATCACCGAC               |
|                     | CoRest                        | CCAGTTCACGGGAAGAGC                 | CTGGCTATGGATTTGTCTGGC              |
|                     | E2F2                          | CCAAGGACCAAGAGAACTAC               | ATACGACCTATTCGAGGGAT               |
|                     | Myb                           | TTGAAGATATGGATCTGCGG               | GACTCTTGTGTGGAGTTTCT               |
|                     | Mip120                        | GAAACCAATACCCAGCAGTA               | TCTGGACAAAGATGACTTGG               |
|                     | Mip130                        | CTGCCAGATTAAGATCTCCC               | AAGTTCTCCGACACAATCTC               |
|                     | Atac3                         | CGATGGCACAAAGCTAGTCA               | CTTGTCGCCCTAAGCGAACTG              |
|                     | Prod                          | ATGTCGAGGAGGATCCCCAA               | ACGCGGCGCATTTTTAACTT               |
|                     | CG2662 (siLint-O)             | AAGTGTGGCAAAGCGAACC                | ACGTTGCATAACCGGCAGTA               |
|                     | CG2199                        | TGCAAAAAGAGGTGCGATGC               | ATGGGATGCTTCTGTGGGTG               |
|                     | Vasa                          | AGCCGTCCAACGATGCA                  | AACATCGCTGCCGGTCA                  |
|                     | Aub                           | ACGGCATTGTGACGAGTAG                | ACGTCCACGAGCAATTACAG               |
|                     | AGO3                          | CTGCATTTGTGGCCTCCATA               | GGGGAGTTTGCCATTCTTT                |
|                     | Piwi                          | CAAGGCCGGATAATTGGACA               | CCATCGCTCGGAGTGGTAAG               |
|                     | control(heterochromatin)      | CAGTTGATGGGATGAATTTGG              | TGCCTGTGGTTCTATCCAAAC              |
|                     | vasa promoter                 | TGAATGAATCACTTAGGTTGCTTG           | TGGTGAATTTCCCATTGTGC               |
| rp49                | CCGCTTCAAGGGACAGTATCTG        | ATCTCGCCGAGTAAACGC                 |                                    |
| RT-qPCR using flies | rp49                          | CCGCTTCAAGGGACAGTATCTG             | ATCTCGCCGAGTAAACGC                 |
|                     | CG2662 (Lint-O)               | CCAAGGACGAAGACAAGGAG               | CGAGGGATCGTACACCTGTT               |

| Sequence Validation of Lint-O fly mutant | CG2662gRNA1_seq      | AACTGATCTCCTTATCCAACCGATGGAAGG       | GCTGCTCCGAAACAGGACTGGTTGTGGAG |
|------------------------------------------|----------------------|--------------------------------------|-------------------------------|
| experiment                               | name                 | sequence                             | vector                        |
| Expression vector for OSC                | L3mbt-ATGR           | CCCGATCCGGGGTCTCTGG                  | pAcF-L(3)mbt-S-3xFLAG         |
|                                          | L3mbt-ATG4           | ATGAGCCTAATTAATCCAAGCCCG             | pAcF-L(3)mbt-S-3xFLAG         |
|                                          | pAcM-Lint-O_F        | AACAAGCTTGGTACCAAAACAATCCAAGGACGAAGA | pAcM-Lint-O                   |
|                                          | pAcM-Lint-O_R        | GACTCGAGCGGCCGCTAATCTAGCCAGGCGAGGC   | pAcM-Lint-O                   |
|                                          | pAcM_F               | GCGGCCGCTCGAGTCTAGAG                 | pAcM                          |
|                                          | pAcM_R               | GGTACCAAGCTTGTTTCAGGT                | pAcM                          |
|                                          | pAc-C3F_F            | CTCGAGGACTACAAAGACCA                 | pAc-C3F_vector                |
|                                          | pAc-C3F_R            | CATGGTGGCTAGCCCGATCC                 | pAc-C3F_vector                |
|                                          | pAc-L3mbt-3xFLAG_F   | GGGCTAGCCACCATGCTGCCATTGTCGATGCCAG   | pAc-L3mbt-3xFLAG              |
|                                          | pAc-L3mbt-3xFLAG_R   | TTTGTAGTCTCGAGAGAGGACGTGCGCAAGGGCG   | pAc-L3mbt-3xFLAG              |
|                                          | pAc-Lint-O-3xFLAG_F  | GGGCTAGCCACCATGAAACAATCCAAGGACGAAGA  | pAc-Lint-O-3xFLAG             |
|                                          | pAc-Lint-O-3xFLAG_R  | TTTGTAGTCTCGAGATCTAGCCAGGCGAGGCCAA   | pAc-Lint-O-3xFLAG             |
|                                          | siRNA resistant_F    | AAAATCGAAAACTGGCTAAGCGTAGACAGCCCTT   | pAc-Lint-O_siRNA_resistant    |
|                                          | siRNA resistant_R    | CTTAGCCAGTTTTTCGATTTTCGCTGGCTTTTCTT  | pAc-Lint-O_siRNA_resistant    |
|                                          | 8CA1_vector_F        | GCCCCGTTAGCCAACGTGAGGGGGCCA          | pAc-Lint-O_8CA-3xFLAG         |
|                                          | 8CA1_vector_R        | GGCCTTCTGGGCGGTGTCGAAGTTGCG          | pAc-Lint-O_8CA-3xFLAG         |
|                                          | 8CA1_insert_F        | CGGCCAGAAGGCCGGCAAAAGCGAACCCA        | pAc-Lint-O_8CA-3xFLAG         |
|                                          | 8CA1_insert_R        | GTTGGTAACCGGGCGTAGCGACACTTGTG        | pAc-Lint-O_8CA-3xFLAG         |
|                                          | 8CA2_vector_F        | GCCAGTTTAGCCGTGGATGCCTATCAC          | pAc-Lint-O_8CA-3xFLAG         |
|                                          | 8CA2_vector_R        | GGCGCCCTTGGCAGTGAGGAAGTTGCT          | pAc-Lint-O_8CA-3xFLAG         |
|                                          | 8CA2_insert_F        | ACTGCCAAGGGCGCCATGCAGAAATGGCAC       | pAc-Lint-O_8CA-3xFLAG         |
|                                          | 8CA2_insert_R        | CACGGCTAAACTGGCAATGGAAGACCTGG        | pAc-Lint-O_8CA-3xFLAG         |
|                                          | Lint-O-ΔSAM-3xFLAG_F | AAGCCATCCATCCAATGACGTTGGCCTCGC       | pAc-Lint-O-ΔSAM-3xFLAG        |
|                                          | Lint-O-ΔSAM-3xFLAG_R | CGTCATTGGATGGATGGCTTCTTCTCTCTA       | pAc-Lint-O-ΔSAM-3xFLAG        |
|                                          | Lint-O-ΔPHD-3xFLAG_F | CTTCGCAACTTCGACGCGTGAACATCGGC        | pAc-Lint-O-ΔPHD-3xFLAG        |
|                                          | Lint-O-ΔPHD-3xFLAG_R | GCCGATGTTACAGCGTCGAAGTTGCGAAG        | pAc-Lint-O-ΔPHD-3xFLAG        |
|                                          | L(3)mbt-L/S_ΔSAM_F   | GGACCACAGTTCCTGGTCGTCTGCAAGTTTGATTC  | pAcF-L(3)mbt-L/S_ΔSAM         |
|                                          | L(3)mbt-L/S_ΔSAM_R   | AAACTTGCAGACGACCAGGAAGTGTGGTCCATAGT  | pAcF-L(3)mbt-L/S_ΔSAM         |

| <b>experiment</b>                        | <b>name</b>    | <b>sequence</b>                          | <b>vector</b>                           |
|------------------------------------------|----------------|------------------------------------------|-----------------------------------------|
| Lint-O fly mutagenesis                   | gRNA_CG2662_1F | CTTCGACGACCCACAATTCCAGCGC                | pBFv-U6.2-Lint-O-gRNA1                  |
|                                          | gRNA_CG2662_1R | AAACGCGCTGGAATTGTGGGTCGTC                | pBFv-U6.2-Lint-O-gRNA1                  |
| Lint-O-Venus transgenic fly construction | Lint-O gRNA5_F | CTTCGACATTAGGTGCTAAGGAGGT                | pBFv-U6.2-Lint-O-gRNA5                  |
|                                          | Lint-O gRNA5_R | AAACACCTCCTTAGCACCTAATGTC                | pBFv-U6.2-Lint-O-gRNA5                  |
|                                          | Lint-O 5'arm_F | GCTTGATATCGAATTCCTTGCCGATCACGTTCCACAAC   | pBS-Lint-Oarm-Venus-3xP3-dsRed-Express2 |
|                                          | Lint-O 5'arm_R | AGTTGGGGCGTAGGATCTAGCCAGGCGAGGCCAACGTC   | pBS-Lint-Oarm-Venus-3xP3-dsRed-Express2 |
|                                          | Lint-O 3'arm_F | TAGTATAGGAACTCCGTCGCCACCCACCTCCTTAGCAC   | pBS-Lint-Oarm-Venus-3xP3-dsRed-Express2 |
|                                          | Lint-O 3'arm_R | CGGGCTGCAGGAATTC TAAAAGGCGTATTTTACTCCATC | pBS-Lint-Oarm-Venus-3xP3-dsRed-Express2 |



## Appendix Table S3. Genes upregulated in L(3)mbt KD

|             |             |             |             |             |             |             |             |             |             |
|-------------|-------------|-------------|-------------|-------------|-------------|-------------|-------------|-------------|-------------|
| FBgn0000053 | FBgn0004919 | FBgn0020391 | FBgn0028916 | FBgn0030742 | FBgn0032105 | FBgn0033431 | FBgn0034988 | FBgn0036503 | FBgn0037853 |
| FBgn0000071 | FBgn0005390 | FBgn0021800 | FBgn0028983 | FBgn0030778 | FBgn0032123 | FBgn0033438 | FBgn0035019 | FBgn0036536 | FBgn0037885 |
| FBgn0000084 | FBgn0005558 | FBgn0022160 | FBgn0028984 | FBgn0030793 | FBgn0032135 | FBgn0033446 | FBgn0035032 | FBgn0036565 | FBgn0037896 |
| FBgn0000108 | FBgn0005631 | FBgn0022359 | FBgn0028996 | FBgn0030816 | FBgn0032161 | FBgn0033448 | FBgn0035034 | FBgn0036574 | FBgn0037902 |
| FBgn0000158 | FBgn0005660 | FBgn0022702 | FBgn0028997 | FBgn0030841 | FBgn0032178 | FBgn0033451 | FBgn0035035 | FBgn0036612 | FBgn0037921 |
| FBgn0000180 | FBgn0005696 | FBgn0022709 | FBgn0029002 | FBgn0030847 | FBgn0032192 | FBgn0033453 | FBgn0035056 | FBgn0036622 | FBgn0037930 |
| FBgn0000246 | FBgn0010014 | FBgn0022768 | FBgn0029004 | FBgn0030864 | FBgn0032210 | FBgn0033459 | FBgn0035073 | FBgn0036640 | FBgn0037950 |
| FBgn0000289 | FBgn0010097 | FBgn0022770 | FBgn0029105 | FBgn0030869 | FBgn0032211 | FBgn0033468 | FBgn0035086 | FBgn0036641 | FBgn0037999 |
| FBgn0000299 | FBgn0010226 | FBgn0022960 | FBgn0029131 | FBgn0030876 | FBgn0032213 | FBgn0033486 | FBgn0035094 | FBgn0036652 | FBgn0038016 |
| FBgn0000317 | FBgn0010246 | FBgn0023023 | FBgn0029137 | FBgn0030884 | FBgn0032221 | FBgn0033538 | FBgn0035146 | FBgn0036687 | FBgn0038037 |
| FBgn0000320 | FBgn0010263 | FBgn0023094 | FBgn0029147 | FBgn0030937 | FBgn0032228 | FBgn0033554 | FBgn0035151 | FBgn0036689 | FBgn0038038 |
| FBgn0000346 | FBgn0010314 | FBgn0023097 | FBgn0029508 | FBgn0030941 | FBgn0032233 | FBgn0033555 | FBgn0035157 | FBgn0036698 | FBgn0038042 |
| FBgn0000422 | FBgn0010317 | FBgn0023171 | FBgn0029514 | FBgn0030955 | FBgn0032249 | FBgn0033627 | FBgn0035167 | FBgn0036732 | FBgn0038045 |
| FBgn0000463 | FBgn0010342 | FBgn0023179 | FBgn0029573 | FBgn0030968 | FBgn0032294 | FBgn0033654 | FBgn0035169 | FBgn0036738 | FBgn0038047 |
| FBgn0000533 | FBgn0010382 | FBgn0023395 | FBgn0029606 | FBgn0030994 | FBgn0032297 | FBgn0033686 | FBgn0035181 | FBgn0036765 | FBgn0038053 |
| FBgn0000536 | FBgn0010391 | FBgn0023509 | FBgn0029694 | FBgn0030997 | FBgn0032364 | FBgn0033715 | FBgn0035265 | FBgn0036773 | FBgn0038105 |
| FBgn0000557 | FBgn0010395 | FBgn0023515 | FBgn0029708 | FBgn0031002 | FBgn0032382 | FBgn0033748 | FBgn0035273 | FBgn0036801 | FBgn0038115 |
| FBgn0000588 | FBgn0010407 | FBgn0023520 | FBgn0029710 | FBgn0031018 | FBgn0032400 | FBgn0033749 | FBgn0035321 | FBgn0036810 | FBgn0038144 |
| FBgn0000615 | FBgn0010441 | FBgn0023537 | FBgn0029712 | FBgn0031037 | FBgn0032402 | FBgn0033753 | FBgn0035325 | FBgn0036813 | FBgn0038191 |
| FBgn0000633 | FBgn0010470 | FBgn0023540 | FBgn0029722 | FBgn0031053 | FBgn0032428 | FBgn0033767 | FBgn0035390 | FBgn0036815 | FBgn0038250 |
| FBgn0000636 | FBgn0010482 | FBgn0024177 | FBgn0029723 | FBgn0031066 | FBgn0032447 | FBgn0033785 | FBgn0035407 | FBgn0036820 | FBgn0038251 |
| FBgn0000644 | FBgn0010602 | FBgn0024236 | FBgn0029733 | FBgn0031091 | FBgn0032452 | FBgn0033799 | FBgn0035410 | FBgn0036821 | FBgn0038252 |
| FBgn0000658 | FBgn0011206 | FBgn0024320 | FBgn0029737 | FBgn0031104 | FBgn0032474 | FBgn0033807 | FBgn0035415 | FBgn0036822 | FBgn0038256 |
| FBgn0000721 | FBgn0011225 | FBgn0024366 | FBgn0029752 | FBgn0031116 | FBgn0032475 | FBgn0033814 | FBgn0035434 | FBgn0036824 | FBgn0038273 |
| FBgn0000996 | FBgn0011274 | FBgn0024432 | FBgn0029754 | FBgn0031148 | FBgn0032484 | FBgn0033815 | FBgn0035445 | FBgn0036875 | FBgn0038277 |
| FBgn0001104 | FBgn0011286 | FBgn0024732 | FBgn0029765 | FBgn0031161 | FBgn0032519 | FBgn0033846 | FBgn0035452 | FBgn0036896 | FBgn0038299 |
| FBgn0001120 | FBgn0011293 | FBgn0024913 | FBgn0029791 | FBgn0031170 | FBgn0032520 | FBgn0033876 | FBgn0035471 | FBgn0036927 | FBgn0038311 |
| FBgn0001128 | FBgn0011606 | FBgn0024920 | FBgn0029823 | FBgn0031171 | FBgn0032521 | FBgn0033890 | FBgn0035476 | FBgn0036929 | FBgn0038312 |
| FBgn0001137 | FBgn0011660 | FBgn0024984 | FBgn0029830 | FBgn0031188 | FBgn0032598 | FBgn0033903 | FBgn0035477 | FBgn0036956 | FBgn0038316 |
| FBgn0001142 | FBgn0011661 | FBgn0024991 | FBgn0029834 | FBgn0031190 | FBgn0032603 | FBgn0033913 | FBgn0035497 | FBgn0036958 | FBgn0038321 |
| FBgn0001222 | FBgn0011704 | FBgn0024995 | FBgn0029843 | FBgn0031191 | FBgn0032652 | FBgn0033921 | FBgn0035505 | FBgn0036969 | FBgn0038349 |
| FBgn0001224 | FBgn0011705 | FBgn0025382 | FBgn0029861 | FBgn0031220 | FBgn0032666 | FBgn0033960 | FBgn0035515 | FBgn0036980 | FBgn0038419 |
| FBgn0001225 | FBgn0011722 | FBgn0025390 | FBgn0029867 | FBgn0031228 | FBgn0032680 | FBgn0033987 | FBgn0035521 | FBgn0036984 | FBgn0038431 |
| FBgn0001226 | FBgn0011761 | FBgn0025638 | FBgn0029892 | FBgn0031232 | FBgn0032698 | FBgn0034013 | FBgn0035523 | FBgn0037000 | FBgn0038452 |
| FBgn0001229 | FBgn0011766 | FBgn0025640 | FBgn0029911 | FBgn0031239 | FBgn0032706 | FBgn0034051 | FBgn0035539 | FBgn0037023 | FBgn0038453 |
| FBgn0001230 | FBgn0011770 | FBgn0025641 | FBgn0029924 | FBgn0031245 | FBgn0032713 | FBgn0034067 | FBgn0035575 | FBgn0037050 | FBgn0038467 |
| FBgn0001233 | FBgn0012037 | FBgn0025682 | FBgn0029930 | FBgn0031252 | FBgn0032727 | FBgn0034075 | FBgn0035578 | FBgn0037060 | FBgn0038476 |
| FBgn0001248 | FBgn0013305 | FBgn0025693 | FBgn0029937 | FBgn0031254 | FBgn0032775 | FBgn0034081 | FBgn0035587 | FBgn0037063 | FBgn0038490 |
| FBgn0001311 | FBgn0013548 | FBgn0025743 | FBgn0029942 | FBgn0031255 | FBgn0032779 | FBgn0034091 | FBgn0035623 | FBgn0037086 | FBgn0038540 |
| FBgn0002567 | FBgn0013563 | FBgn0025814 | FBgn0029970 | FBgn0031260 | FBgn0032797 | FBgn0034095 | FBgn0035645 | FBgn0037092 | FBgn0038550 |
| FBgn0002773 | FBgn0013726 | FBgn0025837 | FBgn0029974 | FBgn0031263 | FBgn0032798 | FBgn0034106 | FBgn0035677 | FBgn0037107 | FBgn0038575 |
| FBgn0002838 | FBgn0013753 | FBgn0026085 | FBgn0029975 | FBgn0031264 | FBgn0032800 | FBgn0034117 | FBgn0035696 | FBgn0037130 | FBgn0038581 |
| FBgn0002878 | FBgn0013763 | FBgn0026176 | FBgn0029977 | FBgn0031313 | FBgn0032813 | FBgn0034162 | FBgn0035710 | FBgn0037182 | FBgn0038596 |
| FBgn0002924 | FBgn0013764 | FBgn0026239 | FBgn0029993 | FBgn0031315 | FBgn0032815 | FBgn0034187 | FBgn0035711 | FBgn0037183 | FBgn0038608 |
| FBgn0002937 | FBgn0013770 | FBgn0026257 | FBgn0030003 | FBgn0031317 | FBgn0032817 | FBgn0034198 | FBgn0035719 | FBgn0037220 | FBgn0038612 |
| FBgn0002948 | FBgn0013773 | FBgn0026263 | FBgn0030009 | FBgn0031320 | FBgn0032821 | FBgn0034199 | FBgn0035751 | FBgn0037225 | FBgn0038613 |
| FBgn0002962 | FBgn0013810 | FBgn0026374 | FBgn0030011 | FBgn0031381 | FBgn0032850 | FBgn0034221 | FBgn0035767 | FBgn0037234 | FBgn0038638 |
| FBgn0002973 | FBgn0014031 | FBgn0026562 | FBgn0030051 | FBgn0031384 | FBgn0032864 | FBgn0034255 | FBgn0035770 | FBgn0037238 | FBgn0038679 |
| FBgn0003016 | FBgn0014133 | FBgn0026592 | FBgn0030099 | FBgn0031413 | FBgn0032881 | FBgn0034269 | FBgn0035825 | FBgn0037239 | FBgn0038682 |
| FBgn0003046 | FBgn0014143 | FBgn0026593 | FBgn0030207 | FBgn0031451 | FBgn0032884 | FBgn0034270 | FBgn0035829 | FBgn0037254 | FBgn0038690 |
| FBgn0003091 | FBgn0014269 | FBgn0026616 | FBgn0030218 | FBgn0031460 | FBgn0032889 | FBgn0034299 | FBgn0035847 | FBgn0037295 | FBgn0038691 |
| FBgn0003114 | FBgn0014342 | FBgn0026682 | FBgn0030320 | FBgn0031484 | FBgn0032895 | FBgn0034304 | FBgn0035904 | FBgn0037296 | FBgn0038815 |
| FBgn0003162 | FBgn0014857 | FBgn0026874 | FBgn0030245 | FBgn0031489 | FBgn0032897 | FBgn0034312 | FBgn0035907 | FBgn0037315 | FBgn0038830 |
| FBgn0003250 | FBgn0014869 | FBgn0027108 | FBgn0030290 | FBgn0031490 | FBgn0032900 | FBgn0034335 | FBgn0035918 | FBgn0037338 | FBgn0038878 |
| FBgn0003301 | FBgn0014931 | FBgn0027280 | FBgn0030313 | FBgn0031520 | FBgn0032906 | FBgn0034371 | FBgn0035936 | FBgn0037354 | FBgn0038912 |
| FBgn0003353 | FBgn0015283 | FBgn0027329 | FBgn0030347 | FBgn0031571 | FBgn0032907 | FBgn0034411 | FBgn0035943 | FBgn0037364 | FBgn0038916 |
| FBgn0003371 | FBgn0015519 | FBgn0027348 | FBgn0030362 | FBgn0031630 | FBgn0032946 | FBgn0034417 | FBgn0035944 | FBgn0037436 | FBgn0038925 |
| FBgn0003390 | FBgn0015520 | FBgn0027491 | FBgn0030396 | FBgn0031636 | FBgn0032955 | FBgn0034420 | FBgn0035945 | FBgn0037469 | FBgn0038928 |
| FBgn0003391 | FBgn0015558 | FBgn0027494 | FBgn0030412 | FBgn0031637 | FBgn0032957 | FBgn0034425 | FBgn0035957 | FBgn0037518 | FBgn0038975 |
| FBgn0003423 | FBgn0015600 | FBgn0027500 | FBgn0030421 | FBgn0031645 | FBgn0032986 | FBgn0034436 | FBgn0035959 | FBgn0037525 | FBgn0038978 |
| FBgn0003435 | FBgn0015602 | FBgn0027550 | FBgn0030432 | FBgn0031646 | FBgn0033015 | FBgn0034452 | FBgn0035964 | FBgn0037562 | FBgn0039002 |
| FBgn0003462 | FBgn0015622 | FBgn0027552 | FBgn0030457 | FBgn0031677 | FBgn0033020 | FBgn0034500 | FBgn0035977 | FBgn0037578 | FBgn0039044 |
| FBgn0003527 | FBgn0015625 | FBgn0027560 | FBgn0030459 | FBgn0031678 | FBgn0033031 | FBgn0034583 | FBgn0035995 | FBgn0037579 | FBgn0039058 |
| FBgn0003567 | FBgn0015664 | FBgn0027585 | FBgn0030468 | FBgn0031716 | FBgn0033033 | FBgn0034592 | FBgn0036031 | FBgn0037581 | FBgn0039108 |
| FBgn0003655 | FBgn0015773 | FBgn0027588 | FBgn0030478 | FBgn0031717 | FBgn0033048 | FBgn0034606 | FBgn0036106 | FBgn0037584 | FBgn0039110 |
| FBgn0003733 | FBgn0015789 | FBgn0027600 | FBgn0030484 | FBgn0031740 | FBgn0033101 | FBgn0034614 | FBgn0036121 | FBgn0037618 | FBgn0039114 |
| FBgn0003888 | FBgn0015801 | FBgn0027654 | FBgn0030485 | FBgn0031741 | FBgn0033134 | FBgn0034628 | FBgn0036144 | FBgn0037623 | FBgn0039125 |
| FBgn0003950 | FBgn0015924 | FBgn0028379 | FBgn0030501 | FBgn0031762 | FBgn0033159 | FBgn0034643 | FBgn0036147 | FBgn0037654 | FBgn0039129 |
| FBgn0004055 | FBgn0015926 | FBgn0028408 | FBgn0030508 | FBgn0031775 | FBgn0033174 | FBgn0034647 | FBgn0036168 | FBgn0037661 | FBgn0039180 |
| FBgn0004108 | FBgn0015929 | FBgn0028425 | FBgn0030520 | FBgn0031816 | FBgn0033177 | FBgn0034694 | FBgn0036194 | FBgn0037664 | FBgn0039189 |
| FBgn0004133 | FBgn0016036 | FBgn0028434 | FBgn0030545 | FBgn0031829 | FBgn0033188 | FBgn0034709 | FBgn0036202 | FBgn0037669 | FBgn0039251 |
| FBgn0004167 | FBgn0016038 | FBgn0028490 | FBgn0030551 | FBgn0031844 | FBgn0033192 | FBgn0034718 | FBgn0036206 | FBgn0037670 | FBgn0039265 |
| FBgn0004360 | FBgn0016054 | FBgn0028523 | FBgn0030555 | FBgn0031850 | FBgn0033204 | FBgn0034720 | FBgn0036224 | FBgn0037679 | FBgn0039277 |
| FBgn0004379 | FBgn0016075 | FBgn0028525 | FBgn0030574 | FBgn0031874 | FBgn0033212 | FBgn0034725 | FBgn0036272 | FBgn0037690 | FBgn0039286 |
| FBgn0004397 | FBgn0016122 | FBgn0028540 | FBgn0030597 | FBgn0031886 | FBgn0033214 | FBgn0034750 | FBgn0036279 | FBgn0037715 | FBgn0039356 |
| FBgn0004400 | FBgn0016123 | FBgn0028546 | FBgn0030600 | FBgn0031896 | FBgn0033215 | FBgn0034753 | FBgn0036288 | FBgn0037721 | FBgn0039504 |
| FBgn0004432 | FBgn0016131 | FBgn0028561 | FBgn0030607 | FBgn0031905 | FBgn0033233 | FBgn0034797 | FBgn0036298 | FBgn0037736 | FBgn0039507 |
| FBgn0004456 | FBgn0016715 | FBgn0028563 | FBgn0030629 | FBgn0031910 | FBgn0033234 | FBgn0034804 | FBgn0036330 | FBgn0037747 | FBgn0039559 |
| FBgn0004581 | FBgn0016794 | FBgn0028572 | FBgn0030630 | FBgn0031920 | FBgn0033261 | FBgn0034816 | FBgn0036354 | FBgn0037749 | FBgn0039561 |
| FBgn0004607 | FBgn0017577 | FBgn0028579 | FBgn0030647 | FBgn0031952 | FBgn0033274 | FBgn0034850 | FBgn0036368 | FBgn0037754 | FBgn0039564 |
| FBgn0004611 | FBgn0019985 | FBgn0028582 | FBgn0030657 | FBgn0031975 | FBgn0033312 | FBgn0034880 | FBgn0036381 | FBgn0037759 | FBgn0039622 |
| FBgn0004623 | FBgn0020257 | FBgn0028622 | FBgn0030660 | FBgn0031986 | FBgn0033373 | FBgn0034885 | FBgn0036391 | FBgn0037779 | FBgn0039640 |
| FBgn0004650 | FBgn0020294 | FBgn0028671 | FBgn0030683 | FBgn0032006 | FBgn0033374 | FBgn0034935 | FBgn0036397 | FBgn0037807 | FBgn0039644 |
| FBgn0004797 | FBgn0020312 | FBgn0028675 | FBgn0030706 | FBgn0032010 | FBgn0033381 | FBgn0034943 | FBgn0036405 | FBgn0037841 | FBgn0039651 |
| FBgn0004882 | FBgn0020372 | FBgn0028743 | FBgn0030716 | FBgn0032013 | FBgn0033382 | FBgn0034950 | FBgn003643  |             |             |

|             |             |             |             |             |             |             |             |             |             |
|-------------|-------------|-------------|-------------|-------------|-------------|-------------|-------------|-------------|-------------|
| FBgn0039681 | FBgn0051140 | FBgn0085223 | FBgn0262719 | FBgn0010453 | FBgn0035168 | FBgn0085483 | FBgn0029856 | FBgn0034279 | FBgn0039911 |
| FBgn0039688 | FBgn0051141 | FBgn0085236 | FBgn0262738 | FBgn0010548 | FBgn0035234 | FBgn0086704 | FBgn0029863 | FBgn0034406 | FBgn0039915 |
| FBgn0039702 | FBgn0051145 | FBgn0085317 | FBgn0262820 | FBgn0011289 | FBgn0035260 | FBgn0250816 | FBgn0029986 | FBgn0034413 | FBgn0039927 |
| FBgn0039714 | FBgn0051156 | FBgn0085319 | FBgn0262937 | FBgn0013576 | FBgn0035264 | FBgn0259101 | FBgn0029987 | FBgn0034476 | FBgn0039932 |
| FBgn0039737 | FBgn0051195 | FBgn0085382 | FBgn0262985 | FBgn0013767 | FBgn0035282 | FBgn0259108 | FBgn0030005 | FBgn0034530 | FBgn0040338 |
| FBgn0039752 | FBgn0051217 | FBgn0085384 | FBgn0263022 | FBgn0013995 | FBgn0035308 | FBgn0259111 | FBgn0030028 | FBgn0034538 | FBgn0040350 |
| FBgn0039755 | FBgn0051220 | FBgn0085405 | FBgn0263023 | FBgn0015032 | FBgn0035724 | FBgn0259163 | FBgn0030073 | FBgn0034662 | FBgn0040697 |
| FBgn0039774 | FBgn0051248 | FBgn0085438 | FBgn0263029 | FBgn0015569 | FBgn0035865 | FBgn0259226 | FBgn0030234 | FBgn0034761 | FBgn0041233 |
| FBgn0039827 | FBgn0051251 | FBgn0086254 | FBgn0263076 | FBgn0020277 | FBgn0035903 | FBgn0259927 | FBgn0030244 | FBgn0034920 | FBgn0041710 |
| FBgn0039844 | FBgn0051344 | FBgn0086356 | FBgn0263106 | FBgn0020415 | FBgn0035917 | FBgn0260003 | FBgn0030310 | FBgn0034942 | FBgn0042179 |
| FBgn0039848 | FBgn0051370 | FBgn0086357 | FBgn0263111 | FBgn0020513 | FBgn0036040 | FBgn0260942 | FBgn0030326 | FBgn0034972 | FBgn0042696 |
| FBgn0039883 | FBgn0051373 | FBgn0086361 | FBgn0263143 | FBgn0023524 | FBgn0036195 | FBgn0261016 | FBgn0030510 | FBgn0034973 | FBgn0043043 |
| FBgn0039896 | FBgn0051431 | FBgn0086384 | FBgn0263234 | FBgn0024941 | FBgn0036282 | FBgn0261446 | FBgn0030596 | FBgn0035104 | FBgn0045980 |
| FBgn0039900 | FBgn0051436 | FBgn0086408 | FBgn0263235 | FBgn0025616 | FBgn0036364 | FBgn0261563 | FBgn0030653 | FBgn0035286 | FBgn0050076 |
| FBgn0039916 | FBgn0051475 | FBgn0086450 | FBgn0263240 | FBgn0025702 | FBgn0036479 | FBgn0261859 | FBgn0030691 | FBgn0035317 | FBgn0050418 |
| FBgn0040009 | FBgn0051516 | FBgn0086690 | FBgn0263258 | FBgn0025878 | FBgn0036568 | FBgn0261996 | FBgn0030697 | FBgn0035348 | FBgn0050460 |
| FBgn0040070 | FBgn0051523 | FBgn0086691 | FBgn0263260 | FBgn0026061 | FBgn0036727 | FBgn0262029 | FBgn0030725 | FBgn0035412 | FBgn0051002 |
| FBgn0040096 | FBgn0051548 | FBgn0086695 | FBgn0263355 | FBgn0026144 | FBgn0036768 | FBgn0262057 | FBgn0030748 | FBgn0035490 | FBgn0051017 |
| FBgn0040102 | FBgn0051619 | FBgn0086898 | FBgn0263395 | FBgn0026439 | FBgn0036769 | FBgn0262477 | FBgn0030846 | FBgn0035504 | FBgn0051321 |
| FBgn0040153 | FBgn0051636 | FBgn0086909 | FBgn0263397 | FBgn0026621 | FBgn0036806 | FBgn0262509 | FBgn0030859 | FBgn0035571 | FBgn0051464 |
| FBgn0040308 | FBgn0051658 | FBgn0087002 | FBgn0263601 | FBgn0027111 | FBgn0036816 | FBgn0262531 | FBgn0031004 | FBgn0035880 | FBgn0051719 |
| FBgn0040321 | FBgn0051674 | FBgn0087007 | FBgn0263974 | FBgn0027356 | FBgn0036978 | FBgn0262624 | FBgn0031005 | FBgn0035941 | FBgn0051997 |
| FBgn0040322 | FBgn0051718 | FBgn0087035 | FBgn0264305 | FBgn0027596 | FBgn0037563 | FBgn0262717 | FBgn0031080 | FBgn0035985 | FBgn0052006 |
| FBgn0040333 | FBgn0051720 | FBgn0243486 | FBgn0264442 | FBgn0027657 | FBgn0037678 | FBgn0262867 | FBgn0031155 | FBgn0036131 | FBgn0052037 |
| FBgn0040348 | FBgn0051789 | FBgn0250732 | FBgn0264443 | FBgn0028491 | FBgn0037714 | FBgn0262871 | FBgn0031157 | FBgn0036145 | FBgn0052073 |
| FBgn0040351 | FBgn0051812 | FBgn0250848 | FBgn0264832 | FBgn0028499 | FBgn0037750 | FBgn0263776 | FBgn0031184 | FBgn0036208 | FBgn0052354 |
| FBgn0040382 | FBgn0051955 | FBgn0259140 | FBgn0264897 | FBgn0028899 | FBgn0037751 | FBgn0264386 | FBgn0031196 | FBgn0036264 | FBgn0052364 |
| FBgn0040384 | FBgn0051974 | FBgn0259143 | FBgn0264953 | FBgn0030001 | FBgn0037906 | FBgn0264489 | FBgn0031257 | FBgn0036287 | FBgn0052461 |
| FBgn0040465 | FBgn0051989 | FBgn0259168 | FBgn0265052 | FBgn0030085 | FBgn0037916 | FBgn0264502 | FBgn0031337 | FBgn0036410 | FBgn0052580 |
| FBgn0040477 | FBgn0051999 | FBgn0259173 | FBgn0265182 | FBgn0030148 | FBgn0037972 | FBgn0264815 | FBgn0031343 | FBgn0036419 | FBgn0052783 |
| FBgn0040507 | FBgn0052068 | FBgn0259185 | FBgn0265262 | FBgn0030271 | FBgn0038017 | FBgn0264895 | FBgn0031548 | FBgn0036428 | FBgn0053481 |
| FBgn0040524 | FBgn0052082 | FBgn0259195 | FBgn0265276 | FBgn0030309 | FBgn0038071 | FBgn0265045 | FBgn0031632 | FBgn0036454 | FBgn0053470 |
| FBgn0040551 | FBgn0052088 | FBgn0259224 | FBgn0265575 | FBgn0030357 | FBgn0038076 | FBgn0265274 | FBgn0031689 | FBgn0036547 | FBgn0063923 |
| FBgn0040666 | FBgn0052177 | FBgn0259238 | FBgn0265598 | FBgn0030367 | FBgn0038079 | FBgn0265726 | FBgn0031715 | FBgn0036575 | FBgn0065110 |
| FBgn0040670 | FBgn0052190 | FBgn0259242 | FBgn0265725 | FBgn0030467 | FBgn0038088 | FBgn0266129 | FBgn0031737 | FBgn0036752 | FBgn0069969 |
| FBgn0040752 | FBgn0052195 | FBgn0259683 | FBgn0266000 | FBgn0030590 | FBgn0038290 | FBgn0266756 | FBgn0031746 | FBgn0036877 | FBgn0085245 |
| FBgn0040759 | FBgn0052280 | FBgn0259685 | FBgn0266101 | FBgn0030734 | FBgn0038330 | FBgn0267339 | FBgn0031751 | FBgn0036891 | FBgn0085261 |
| FBgn0040823 | FBgn0052313 | FBgn0259714 | FBgn0266418 | FBgn0030746 | FBgn0038420 | FBgn0283451 | FBgn0031770 | FBgn0036910 | FBgn0085298 |
| FBgn0040837 | FBgn0052365 | FBgn0259734 | FBgn0266421 | FBgn0030798 | FBgn0038492 | FBgn0284435 | FBgn0031869 | FBgn0036979 | FBgn0085400 |
| FBgn0040900 | FBgn0052368 | FBgn0259740 | FBgn0266465 | FBgn0030993 | FBgn0038602 | FBgn0000044 | FBgn0031974 | FBgn0036993 | FBgn0085409 |
| FBgn0041102 | FBgn0052373 | FBgn0259745 | FBgn0266521 | FBgn0030998 | FBgn0038652 | FBgn0000046 | FBgn0031998 | FBgn0036997 | FBgn0085417 |
| FBgn0041180 | FBgn0052436 | FBgn0259791 | FBgn0266709 | FBgn0031097 | FBgn0038828 | FBgn0000146 | FBgn0032048 | FBgn0037028 | FBgn0085427 |
| FBgn0041186 | FBgn0052476 | FBgn0260388 | FBgn0266719 | FBgn0031195 | FBgn0038881 | FBgn0000153 | FBgn0032058 | FBgn0037042 | FBgn0085428 |
| FBgn0041205 | FBgn0052483 | FBgn0260399 | FBgn0266757 | FBgn0031240 | FBgn0039094 | FBgn0000473 | FBgn0032082 | FBgn0037222 | FBgn0085475 |
| FBgn0041582 | FBgn0052485 | FBgn0260462 | FBgn0266801 | FBgn0031414 | FBgn0039099 | FBgn0000826 | FBgn0032140 | FBgn0037276 | FBgn0087040 |
| FBgn0041706 | FBgn0052506 | FBgn0260653 | FBgn0267698 | FBgn0031515 | FBgn0039201 | FBgn0010190 | FBgn0032225 | FBgn0037304 | FBgn0250869 |
| FBgn0041723 | FBgn0052549 | FBgn0260743 | FBgn0267792 | FBgn0031634 | FBgn0039415 | FBgn0001216 | FBgn0032252 | FBgn0037347 | FBgn0250904 |
| FBgn0042178 | FBgn0052557 | FBgn0260766 | FBgn0267828 | FBgn0031745 | FBgn0039500 | FBgn0001259 | FBgn0032253 | FBgn0037375 | FBgn0250907 |
| FBgn0042185 | FBgn0052579 | FBgn0260795 | FBgn0267967 | FBgn0031894 | FBgn0039503 | FBgn0003137 | FBgn0032322 | FBgn0037513 | FBgn0259196 |
| FBgn0043001 | FBgn0052625 | FBgn0260874 | FBgn0283440 | FBgn0031961 | FBgn0039594 | FBgn0003187 | FBgn0032350 | FBgn0037515 | FBgn0259682 |
| FBgn0043575 | FBgn0052626 | FBgn0260932 | FBgn0283442 | FBgn0031973 | FBgn0039734 | FBgn0003292 | FBgn0032374 | FBgn0037659 | FBgn0259977 |
| FBgn0043792 | FBgn0052676 | FBgn0260933 | FBgn0283509 | FBgn0032003 | FBgn0039789 | FBgn0003308 | FBgn0032375 | FBgn0037683 | FBgn0260386 |
| FBgn0043900 | FBgn0052677 | FBgn0260943 | FBgn0283545 | FBgn0032040 | FBgn0039886 | FBgn0003312 | FBgn0032601 | FBgn0037835 | FBgn0260430 |
| FBgn0044871 | FBgn0052679 | FBgn0260986 | FBgn0284221 | FBgn0032055 | FBgn0039897 | FBgn0003486 | FBgn0032660 | FBgn0037915 | FBgn0260446 |
| FBgn0045064 | FBgn0052706 | FBgn0260991 | FBgn0284243 | FBgn0032078 | FBgn0040071 | FBgn0003886 | FBgn0032683 | FBgn0037934 | FBgn0260658 |
| FBgn0045823 | FBgn0052813 | FBgn0261041 | FBgn0284408 | FBgn0032218 | FBgn0040091 | FBgn0003889 | FBgn0032774 | FBgn0037960 | FBgn0260746 |
| FBgn0045842 | FBgn0052814 | FBgn0261053 | FBgn0284442 | FBgn0032262 | FBgn0040260 | FBgn0003890 | FBgn0032783 | FBgn0037973 | FBgn0260780 |
| FBgn0046258 | FBgn0052982 | FBgn0261085 | FBgn0286222 | FBgn0032345 | FBgn0040349 | FBgn0004118 | FBgn0032788 | FBgn0037974 | FBgn0261393 |
| FBgn0046763 | FBgn0053017 | FBgn0261086 | FBgn0286507 | FBgn0032381 | FBgn0040658 | FBgn0004512 | FBgn0032803 | FBgn0038067 | FBgn0261561 |
| FBgn0046878 | FBgn0053062 | FBgn0261243 | FBgn0286778 | FBgn0032422 | FBgn0041096 | FBgn0004878 | FBgn0032820 | FBgn0038172 | FBgn0261999 |
| FBgn0050015 | FBgn0053087 | FBgn0261261 | FBgn0286788 | FBgn0032473 | FBgn0041234 | FBgn0005666 | FBgn0032910 | FBgn0038247 | FBgn0262473 |
| FBgn0050016 | FBgn0053099 | FBgn0261262 | FBgn0287186 | FBgn0032726 | FBgn0042133 | FBgn0010105 | FBgn0032973 | FBgn0038260 | FBgn0262602 |
| FBgn0050069 | FBgn0053108 | FBgn0261341 | FBgn0287695 | FBgn0032749 | FBgn0043806 | FBgn0010241 | FBgn0033051 | FBgn0038261 | FBgn0262686 |
| FBgn0050085 | FBgn0053156 | FBgn0261363 | FBgn0287767 | FBgn0032752 | FBgn0050115 | FBgn0010258 | FBgn0033079 | FBgn0038279 | FBgn0262794 |
| FBgn0050089 | FBgn0053177 | FBgn0261385 | FBgn0287831 | FBgn0033096 | FBgn0050195 | FBgn0010473 | FBgn0033115 | FBgn0038292 | FBgn0262814 |
| FBgn0050091 | FBgn0053207 | FBgn0261445 | FBgn0000075 | FBgn0033203 | FBgn0050485 | FBgn0011296 | FBgn0033132 | FBgn0038315 | FBgn0263132 |
| FBgn0050106 | FBgn0053229 | FBgn0261549 | FBgn0000244 | FBgn0033222 | FBgn0050502 | FBgn0011828 | FBgn0033221 | FBgn0038373 | FBgn0263772 |
| FBgn0050151 | FBgn0053289 | FBgn0261584 | FBgn0000256 | FBgn0033252 | FBgn0051161 | FBgn0013348 | FBgn0033229 | FBgn0038397 | FBgn0264542 |
| FBgn0050156 | FBgn0053468 | FBgn0261625 | FBgn0000477 | FBgn0033421 | FBgn0051202 | FBgn0013813 | FBgn0033257 | FBgn0038407 | FBgn0264748 |
| FBgn0050289 | FBgn0053469 | FBgn0261649 | FBgn0000927 | FBgn0033504 | FBgn0051231 | FBgn0014018 | FBgn0033268 | FBgn0038435 | FBgn0264894 |
| FBgn0050296 | FBgn0053494 | FBgn0261673 | FBgn0001263 | FBgn0033610 | FBgn0051279 | FBgn0014395 | FBgn0033387 | FBgn0038603 | FBgn0264979 |
| FBgn0050359 | FBgn0053542 | FBgn0261794 | FBgn0001991 | FBgn0033657 | FBgn0051706 | FBgn0014417 | FBgn0033494 | FBgn0038740 | FBgn0265044 |
| FBgn0050379 | FBgn0053556 | FBgn0261952 | FBgn0002778 | FBgn0033872 | FBgn0051721 | FBgn0020307 | FBgn0033518 | FBgn0038784 | FBgn0265767 |
| FBgn0050380 | FBgn0053653 | FBgn0261955 | FBgn0003028 | FBgn0033963 | FBgn0052036 | FBgn0020377 | FBgn0033519 | FBgn0038814 | FBgn0266534 |
| FBgn0050383 | FBgn0053679 | FBgn0261985 | FBgn0003149 | FBgn0034070 | FBgn0052703 | FBgn0020379 | FBgn0033520 | FBgn0038894 | FBgn0266566 |
| FBgn0050403 | FBgn0053775 | FBgn0261987 | FBgn0003159 | FBgn0034094 | FBgn0052792 | FBgn0020414 | FBgn0033580 | FBgn0038957 | FBgn0267408 |
| FBgn0050414 | FBgn0053792 | FBgn0262035 | FBgn0003174 | FBgn0034247 | FBgn0052815 | FBgn0020390 | FBgn0033628 | FBgn0038959 | FBgn0285896 |
| FBgn0050424 | FBgn0053926 | FBgn0262101 | FBgn0003447 | FBgn0034278 | FBgn0052816 | FBgn0023416 | FBgn0033631 | FBgn0039006 | FBgn0288071 |
| FBgn0050438 | FBgn0053969 | FBgn0262364 | FBgn0003460 | FBgn0034437 | FBgn0052944 | FBgn0023495 | FBgn0033658 | FBgn0039015 | FBgn0286785 |
| FBgn0050440 | FBgn0054012 | FBgn0262508 | FBgn0003475 | FBgn0034489 | FBgn0053003 | FBgn0024189 | FBgn0033659 | FBgn0039051 | FBgn0287209 |
| FBgn0050466 | FBgn0054021 | FBgn0262515 | FBgn0003719 | FBgn0034497 | FBgn0053257 | FBgn0024836 | FBgn0033763 | FBgn0039073 |             |
| FBgn0050484 | FBgn0054033 | FBgn0262524 | FBgn0003867 | FBgn0034602 | FBgn0053519 | FBgn0026255 | FBgn0033773 | FBgn0039178 |             |
| FBgn0051021 | FBgn0058006 | FBgn0262559 | FBgn0004047 | FBgn0034639 | FBgn0054031 | FBgn0026376 | FBgn0033875 | FBgn0039272 |             |
| FBgn0051041 | FBgn0058298 | FBgn0262562 | FBgn0004198 | FBgn0034706 | FBgn0061356 | FBgn0026393 | FBgn0033917 | FBgn0039282 |             |
| FBgn0051053 | FBgn0062413 | FBgn0262563 | FBgn0004514 | FBgn0034928 | FBgn0085421 | FBgn0027073 | FBgn0034047 | FBgn0039294 |             |
| FBgn0051072 | FBgn0065032 | FBgn0262579 | FBgn0004577 | FBgn0034974 |             |             |             |             |             |

## Appendix Table S3. Genes downregulated in L(3)mbt KD

|             |             |             |             |             |             |             |             |             |             |
|-------------|-------------|-------------|-------------|-------------|-------------|-------------|-------------|-------------|-------------|
| FBgn0000036 | FBgn0010265 | FBgn0023081 | FBgn0027836 | FBgn0031169 | FBgn0033086 | FBgn0034543 | FBgn0036035 | FBgn0037648 | FBgn0039274 |
| FBgn0000064 | FBgn0010340 | FBgn0023091 | FBgn0027873 | FBgn0031233 | FBgn0033088 | FBgn0034617 | FBgn0036038 | FBgn0037652 | FBgn0039303 |
| FBgn0000116 | FBgn0010348 | FBgn0023143 | FBgn0027932 | FBgn0031238 | FBgn0033089 | FBgn0034631 | FBgn0036058 | FBgn0037686 | FBgn0039306 |
| FBgn0000181 | FBgn0010355 | FBgn0023169 | FBgn0028331 | FBgn0031256 | FBgn0033184 | FBgn0034641 | FBgn0036063 | FBgn0037710 | FBgn0039338 |
| FBgn0000247 | FBgn0010383 | FBgn0023507 | FBgn0028341 | FBgn0031281 | FBgn0033209 | FBgn0034650 | FBgn0036124 | FBgn0037723 | FBgn0039349 |
| FBgn0000261 | FBgn0010409 | FBgn0023510 | FBgn0028427 | FBgn0031282 | FBgn0033225 | FBgn0034703 | FBgn0036126 | FBgn0037741 | FBgn0039358 |
| FBgn0000283 | FBgn0010504 | FBgn0023514 | FBgn0028429 | FBgn0031286 | FBgn0033226 | FBgn0034707 | FBgn0036136 | FBgn0037743 | FBgn0039359 |
| FBgn0000319 | FBgn0010520 | FBgn0023519 | FBgn0028473 | FBgn0031307 | FBgn0033235 | FBgn0034728 | FBgn0036141 | FBgn0037778 | FBgn0039406 |
| FBgn0000339 | FBgn0010551 | FBgn0023521 | FBgn0028479 | FBgn0031321 | FBgn0033244 | FBgn0034741 | FBgn0036173 | FBgn0037794 | FBgn0039419 |
| FBgn0000377 | FBgn0010611 | FBgn0023527 | FBgn0028484 | FBgn0031360 | FBgn0033304 | FBgn0034792 | FBgn0036187 | FBgn0037810 | FBgn0039464 |
| FBgn0000395 | FBgn0010651 | FBgn0024245 | FBgn0028500 | FBgn0031456 | FBgn0033352 | FBgn0034849 | FBgn0036207 | FBgn0037852 | FBgn0039555 |
| FBgn0000426 | FBgn0010770 | FBgn0024277 | FBgn0028504 | FBgn0031497 | FBgn0033354 | FBgn0034858 | FBgn0036237 | FBgn0037882 | FBgn0039558 |
| FBgn0000455 | FBgn0010772 | FBgn0024285 | FBgn0028506 | FBgn0031500 | FBgn0033357 | FBgn0034909 | FBgn0036254 | FBgn0037891 | FBgn0039600 |
| FBgn0000559 | FBgn0010786 | FBgn0024329 | FBgn0028509 | FBgn0031516 | FBgn0033376 | FBgn0034915 | FBgn0036257 | FBgn0037899 | FBgn0039627 |
| FBgn0000560 | FBgn0010803 | FBgn0024330 | FBgn0028527 | FBgn0031540 | FBgn0033379 | FBgn0034918 | FBgn0036258 | FBgn0037901 | FBgn0039632 |
| FBgn0000566 | FBgn0010926 | FBgn0024556 | FBgn0028530 | FBgn0031597 | FBgn0033395 | FBgn0034936 | FBgn0036301 | FBgn0037926 | FBgn0039636 |
| FBgn0000579 | FBgn0011204 | FBgn0024698 | FBgn0028538 | FBgn0031603 | FBgn0033428 | FBgn0034938 | FBgn0036309 | FBgn0037933 | FBgn0039654 |
| FBgn0000635 | FBgn0011361 | FBgn0024806 | FBgn0028550 | FBgn0031639 | FBgn0033454 | FBgn0034940 | FBgn0036318 | FBgn0037955 | FBgn0039726 |
| FBgn0001087 | FBgn0011591 | FBgn0024958 | FBgn0028577 | FBgn0031643 | FBgn0033460 | FBgn0034948 | FBgn0036324 | FBgn0037958 | FBgn0039727 |
| FBgn0001092 | FBgn0011638 | FBgn0024983 | FBgn0028647 | FBgn0031651 | FBgn0033467 | FBgn0034964 | FBgn0036333 | FBgn0037979 | FBgn0039740 |
| FBgn0001098 | FBgn0011708 | FBgn0024992 | FBgn0028689 | FBgn0031657 | FBgn0033476 | FBgn0035001 | FBgn0036386 | FBgn0037998 | FBgn0039754 |
| FBgn0001149 | FBgn0011737 | FBgn0025366 | FBgn0028690 | FBgn0031659 | FBgn0033483 | FBgn0035020 | FBgn0036451 | FBgn0038039 | FBgn0039756 |
| FBgn0001168 | FBgn0011769 | FBgn0025582 | FBgn0028697 | FBgn0031660 | FBgn0033507 | FBgn0035039 | FBgn0036460 | FBgn0038057 | FBgn0039765 |
| FBgn0001179 | FBgn0011771 | FBgn0025628 | FBgn0028707 | FBgn0031710 | FBgn0033528 | FBgn0035049 | FBgn0036484 | FBgn0038110 | FBgn0039828 |
| FBgn0001186 | FBgn0011817 | FBgn0025631 | FBgn0028744 | FBgn0031805 | FBgn0033540 | FBgn0035063 | FBgn0036500 | FBgn0038183 | FBgn0039868 |
| FBgn0001202 | FBgn0012036 | FBgn0025674 | FBgn0028919 | FBgn0031820 | FBgn0033544 | FBgn0035083 | FBgn0036502 | FBgn0038194 | FBgn0039870 |
| FBgn0001247 | FBgn0013432 | FBgn0025742 | FBgn0028926 | FBgn0031832 | FBgn0033547 | FBgn0035085 | FBgn0036509 | FBgn0038195 | FBgn0039902 |
| FBgn0001258 | FBgn0013435 | FBgn0025781 | FBgn0028962 | FBgn0031851 | FBgn0033548 | FBgn0035087 | FBgn0036514 | FBgn0038235 | FBgn0039920 |
| FBgn0001308 | FBgn0013531 | FBgn0025802 | FBgn0028982 | FBgn0031881 | FBgn0033551 | FBgn0035106 | FBgn0036522 | FBgn0038269 | FBgn0039929 |
| FBgn0001316 | FBgn0013749 | FBgn0025809 | FBgn0028990 | FBgn0031885 | FBgn0033556 | FBgn0035121 | FBgn0036570 | FBgn0038271 | FBgn0039993 |
| FBgn0001324 | FBgn0013750 | FBgn0025830 | FBgn0029006 | FBgn0031893 | FBgn0033557 | FBgn0035131 | FBgn0036571 | FBgn0038272 | FBgn0040011 |
| FBgn0001341 | FBgn0013756 | FBgn0025832 | FBgn0029114 | FBgn0031904 | FBgn0033571 | FBgn0035137 | FBgn0036579 | FBgn0038275 | FBgn0040022 |
| FBgn0001565 | FBgn0013762 | FBgn0026015 | FBgn0029117 | FBgn0031914 | FBgn0033592 | FBgn0035142 | FBgn0036614 | FBgn0038294 | FBgn0040064 |
| FBgn0001983 | FBgn0014007 | FBgn0026084 | FBgn0029133 | FBgn0031951 | FBgn0033638 | FBgn0035165 | FBgn0036623 | FBgn0038344 | FBgn0040228 |
| FBgn0002031 | FBgn0014010 | FBgn0026088 | FBgn0029664 | FBgn0031969 | FBgn0033652 | FBgn0035173 | FBgn0036627 | FBgn0038369 | FBgn0040236 |
| FBgn0002413 | FBgn0014011 | FBgn0026089 | FBgn0029688 | FBgn0031985 | FBgn0033661 | FBgn0035189 | FBgn0036668 | FBgn0038376 | FBgn0040271 |
| FBgn0002441 | FBgn0014075 | FBgn0026147 | FBgn0029689 | FBgn0032004 | FBgn0033672 | FBgn0035203 | FBgn0036684 | FBgn0038389 | FBgn0040294 |
| FBgn0002566 | FBgn0014366 | FBgn0026149 | FBgn0029706 | FBgn0032016 | FBgn0033688 | FBgn0035205 | FBgn0036686 | FBgn0038426 | FBgn0040389 |
| FBgn0002579 | FBgn0014427 | FBgn0026179 | FBgn0029718 | FBgn0032026 | FBgn0033698 | FBgn0035227 | FBgn0036702 | FBgn0038432 | FBgn0040467 |
| FBgn0002593 | FBgn0015037 | FBgn0026181 | FBgn0029755 | FBgn0032033 | FBgn0033713 | FBgn0035232 | FBgn0036754 | FBgn0038454 | FBgn0041094 |
| FBgn0002643 | FBgn0015221 | FBgn0026196 | FBgn0029785 | FBgn0032034 | FBgn0033738 | FBgn0035236 | FBgn0036805 | FBgn0038455 | FBgn0041147 |
| FBgn0002780 | FBgn0015222 | FBgn0026250 | FBgn0029804 | FBgn0032077 | FBgn0033741 | FBgn0035295 | FBgn0036811 | FBgn0038473 | FBgn0041588 |
| FBgn0002887 | FBgn0015229 | FBgn0026252 | FBgn0029870 | FBgn0032138 | FBgn0033754 | FBgn0035334 | FBgn0036814 | FBgn0038488 | FBgn0041604 |
| FBgn0003008 | FBgn0015245 | FBgn0026262 | FBgn0029885 | FBgn0032168 | FBgn0033766 | FBgn0035336 | FBgn0036828 | FBgn0038491 | FBgn0041627 |
| FBgn0003062 | FBgn0015268 | FBgn0026317 | FBgn0029895 | FBgn0032208 | FBgn0033769 | FBgn0035393 | FBgn0036837 | FBgn0038578 | FBgn0041629 |
| FBgn0003189 | FBgn0015269 | FBgn0026373 | FBgn0029959 | FBgn0032217 | FBgn0033808 | FBgn0035402 | FBgn0036838 | FBgn0038585 | FBgn0041789 |
| FBgn0003204 | FBgn0015279 | FBgn0026378 | FBgn0029996 | FBgn0032222 | FBgn0033816 | FBgn0035420 | FBgn0036853 | FBgn0038593 | FBgn0042083 |
| FBgn0003231 | FBgn0015288 | FBgn0026380 | FBgn0030018 | FBgn0032229 | FBgn0033842 | FBgn0035422 | FBgn0036886 | FBgn0038651 | FBgn0042134 |
| FBgn0003257 | FBgn0015338 | FBgn0026417 | FBgn0030052 | FBgn0032230 | FBgn0033859 | FBgn0035438 | FBgn0036892 | FBgn0038666 | FBgn0042213 |
| FBgn0003274 | FBgn0015477 | FBgn0026582 | FBgn0030060 | FBgn0032236 | FBgn0033900 | FBgn0035440 | FBgn0036900 | FBgn0038672 | FBgn0042712 |
| FBgn0003278 | FBgn0015521 | FBgn0026630 | FBgn0030061 | FBgn0032242 | FBgn0033907 | FBgn0035462 | FBgn0036916 | FBgn0038742 | FBgn0044047 |
| FBgn0003360 | FBgn0015527 | FBgn0026634 | FBgn0030067 | FBgn0032243 | FBgn0033918 | FBgn0035499 | FBgn0036920 | FBgn0038745 | FBgn0044323 |
| FBgn0003366 | FBgn0015754 | FBgn0026666 | FBgn0030092 | FBgn0032248 | FBgn0033924 | FBgn0035524 | FBgn0036922 | FBgn0038746 | FBgn0044452 |
| FBgn0003401 | FBgn0015765 | FBgn0026751 | FBgn0030136 | FBgn0032261 | FBgn0033984 | FBgn0035541 | FBgn0037008 | FBgn0038834 | FBgn0046685 |
| FBgn0003559 | FBgn0015791 | FBgn0026787 | FBgn0030177 | FBgn0032296 | FBgn0033989 | FBgn0035588 | FBgn0037011 | FBgn0038853 | FBgn0050000 |
| FBgn0003656 | FBgn0015794 | FBgn0026869 | FBgn0030183 | FBgn0032321 | FBgn0033995 | FBgn0035589 | FBgn0037012 | FBgn0038854 | FBgn0050022 |
| FBgn0003716 | FBgn0015795 | FBgn0027055 | FBgn0030291 | FBgn0032395 | FBgn0034001 | FBgn0035591 | FBgn0037019 | FBgn0038857 | FBgn0050035 |
| FBgn0003891 | FBgn0015797 | FBgn0027057 | FBgn0030321 | FBgn0032397 | FBgn0034027 | FBgn0035600 | FBgn0037071 | FBgn0038858 | FBgn0050159 |
| FBgn0003941 | FBgn0015829 | FBgn0027066 | FBgn0030406 | FBgn0032398 | FBgn0034029 | FBgn0035603 | FBgn0037073 | FBgn0038869 | FBgn0050169 |
| FBgn0003984 | FBgn0015925 | FBgn0027079 | FBgn0030431 | FBgn0032408 | FBgn0034054 | FBgn0035630 | FBgn0037105 | FBgn0038870 | FBgn0050342 |
| FBgn0004087 | FBgn0016081 | FBgn0027080 | FBgn0030479 | FBgn0032445 | FBgn0034073 | FBgn0035656 | FBgn0037137 | FBgn0038889 | FBgn0050349 |
| FBgn0004367 | FBgn0016641 | FBgn0027081 | FBgn0030482 | FBgn0032479 | FBgn0034087 | FBgn0035688 | FBgn0037151 | FBgn0038890 | FBgn0050394 |
| FBgn0004387 | FBgn0016685 | FBgn0027082 | FBgn0030519 | FBgn0032487 | FBgn0034109 | FBgn0035703 | FBgn0037206 | FBgn0038893 | FBgn0050404 |
| FBgn0004390 | FBgn0016701 | FBgn0027086 | FBgn0030569 | FBgn0032597 | FBgn0034110 | FBgn0035714 | FBgn0037231 | FBgn0038953 | FBgn0050410 |
| FBgn0004404 | FBgn0016726 | FBgn0027087 | FBgn0030588 | FBgn0032620 | FBgn0034113 | FBgn0035722 | FBgn0037232 | FBgn0038964 | FBgn0050423 |
| FBgn0004465 | FBgn0016797 | FBgn0027088 | FBgn0030603 | FBgn0032634 | FBgn0034118 | FBgn0035725 | FBgn0037327 | FBgn0038968 | FBgn0050476 |
| FBgn0004556 | FBgn0016917 | FBgn0027090 | FBgn0030634 | FBgn0032656 | FBgn0034158 | FBgn0035727 | FBgn0037328 | FBgn0038989 | FBgn0050491 |
| FBgn0004638 | FBgn0016930 | FBgn0027091 | FBgn0030641 | FBgn0032670 | FBgn0034180 | FBgn0035754 | FBgn0037345 | FBgn0039004 | FBgn0050493 |
| FBgn0004876 | FBgn0017578 | FBgn0027093 | FBgn0030654 | FBgn0032690 | FBgn0034191 | FBgn0035760 | FBgn0037382 | FBgn0039043 | FBgn0051111 |
| FBgn0004893 | FBgn0020236 | FBgn0027094 | FBgn0030658 | FBgn0032699 | FBgn0034214 | FBgn0035763 | FBgn0037391 | FBgn0039055 | FBgn0051133 |
| FBgn0004901 | FBgn0020278 | FBgn0027101 | FBgn0030671 | FBgn0032724 | FBgn0034223 | FBgn0035802 | FBgn0037487 | FBgn0039056 | FBgn0051223 |
| FBgn0004907 | FBgn0020445 | FBgn0027296 | FBgn0030676 | FBgn0032728 | FBgn0034243 | FBgn0035805 | FBgn0037489 | FBgn0039109 | FBgn0051224 |
| FBgn0004908 | FBgn0020497 | FBgn0027330 | FBgn0030687 | FBgn0032731 | FBgn0034246 | FBgn0035833 | FBgn0037529 | FBgn0039120 | FBgn0051278 |
| FBgn0004926 | FBgn0020622 | FBgn0027493 | FBgn0030692 | FBgn0032781 | FBgn0034258 | FBgn0035851 | FBgn0037536 | FBgn0039136 | FBgn0051357 |
| FBgn0005278 | FBgn0020764 | FBgn0027503 | FBgn0030720 | FBgn0032799 | FBgn0034259 | FBgn0035868 | FBgn0037537 | FBgn0039139 | FBgn0051361 |
| FBgn0005533 | FBgn0020767 | FBgn0027508 | FBgn0030739 | FBgn0032811 | FBgn0034271 | FBgn0035877 | FBgn0037541 | FBgn0039145 | FBgn0051368 |
| FBgn0005612 | FBgn0021764 | FBgn0027525 | FBgn0030752 | FBgn0032849 | FBgn0034315 | FBgn0035879 | FBgn0037543 | FBgn0039155 | FBgn0051522 |
| FBgn0005616 | FBgn0021768 | FBgn0027526 | FBgn0030805 | FBgn0032886 | FBgn0034351 | FBgn0035901 | FBgn0037549 | FBgn0039156 | FBgn0051678 |
| FBgn0005624 | FBgn0021796 | FBgn0027554 | FBgn0030809 | FBgn0032891 | FBgn0034361 | FBgn0035923 | FBgn0037551 | FBgn0039157 | FBgn0051755 |
| FBgn0005632 | FBgn0021874 | FBgn0027568 | FBgn0030850 | FBgn0032919 | FBgn0034392 | FBgn0035953 | FBgn0037561 | FBgn0039175 | FBgn0051759 |
| FBgn0005640 | FBgn0021979 | FBgn0027569 | FBgn0030894 | FBgn0032923 | FBgn0034400 | FBgn0035969 | FBgn0037565 | FBgn0039205 | FBgn0051852 |
| FBgn0005672 | FBgn0021995 | FBgn0027583 | FBgn0030969 | FBgn0032925 | FBgn0034401 | FBgn0035986 | FBgn0037580 | FBgn0039207 | FBgn0052039 |
| FBgn0005674 | FBgn0022029 | FBgn0027594 | FBgn0031040 | FBgn0032956 | FBgn0034418 | FBgn0035996 | FBgn0037603 | FBgn0039223 | FBgn0052069 |
| FBgn0005777 | FBgn0022069 | FBgn0027615 | FBgn0031051 | FBgn0032974 | FBgn0034447 | FBgn0036000 | FBgn0037608 | FBgn0039252 | FBgn0052075 |
| FBgn0010038 | FBgn0022238 | FBgn0027655 | FBgn0031114 | FBgn0032988 | FBgn0034493 | FBgn0036007 | FBgn003760  |             |             |

|             |             |             |             |
|-------------|-------------|-------------|-------------|
| FBgn0052344 | FBgn0261938 | FBgn0024183 | FBgn0039704 |
| FBgn0052423 | FBgn0261984 | FBgn0026160 | FBgn0040079 |
| FBgn0052521 | FBgn0262115 | FBgn0028496 | FBgn0040251 |
| FBgn0052533 | FBgn0262117 | FBgn0029879 | FBgn0040256 |
| FBgn0052594 | FBgn0262125 | FBgn0029896 | FBgn0040259 |
| FBgn0052600 | FBgn0262126 | FBgn0030156 | FBgn0040609 |
| FBgn0052649 | FBgn0262160 | FBgn0030870 | FBgn0042173 |
| FBgn0052672 | FBgn0262166 | FBgn0031011 | FBgn0045843 |
| FBgn0053052 | FBgn0262527 | FBgn0031530 | FBgn0051547 |
| FBgn0053100 | FBgn0262582 | FBgn0031568 | FBgn0051642 |
| FBgn0053129 | FBgn0262601 | FBgn0031673 | FBgn0051876 |
| FBgn0053158 | FBgn0262647 | FBgn0032723 | FBgn0052641 |
| FBgn0053180 | FBgn0262733 | FBgn0034389 | FBgn0052655 |
| FBgn0061469 | FBgn0262954 | FBgn0034501 | FBgn0063491 |
| FBgn0061476 | FBgn0262955 | FBgn0034734 | FBgn0085249 |
| FBgn0063492 | FBgn0263110 | FBgn0034903 | FBgn0085407 |
| FBgn0063493 | FBgn0263120 | FBgn0035023 | FBgn0263116 |
| FBgn0064225 | FBgn0263200 | FBgn0035470 | FBgn0264699 |
| FBgn0064766 | FBgn0263316 | FBgn0037613 | FBgn0266261 |
| FBgn0066084 | FBgn0263346 | FBgn0037672 | FBgn0266431 |
| FBgn0085192 | FBgn0263351 | FBgn0037989 | FBgn0286782 |
| FBgn0085294 | FBgn0263510 | FBgn0038720 |             |
| FBgn0085339 | FBgn0263594 | FBgn0039209 |             |
| FBgn0085376 | FBgn0263599 | FBgn0039257 |             |
| FBgn0085437 | FBgn0263605 | FBgn0039266 |             |
| FBgn0085451 | FBgn0263606 | FBgn0039829 |             |
| FBgn0086130 | FBgn0263740 | FBgn0039858 |             |
| FBgn0086251 | FBgn0263929 | FBgn0040299 |             |
| FBgn0086347 | FBgn0263995 | FBgn0040496 |             |
| FBgn0086371 | FBgn0264006 | FBgn0043841 |             |
| FBgn0086443 | FBgn0264294 | FBgn0050428 |             |
| FBgn0086446 | FBgn0264325 | FBgn0051525 |             |
| FBgn0086451 | FBgn0264560 | FBgn0052311 |             |
| FBgn0086472 | FBgn0264751 | FBgn0062978 |             |
| FBgn0086679 | FBgn0264978 | FBgn0082585 |             |
| FBgn0086687 | FBgn0265003 | FBgn0086906 |             |
| FBgn0086706 | FBgn0265187 | FBgn0243512 |             |
| FBgn0086710 | FBgn0265413 | FBgn0250753 |             |
| FBgn0086711 | FBgn0265574 | FBgn0259245 |             |
| FBgn0086895 | FBgn0265998 | FBgn0259935 |             |
| FBgn0086912 | FBgn0266019 | FBgn0259938 |             |
| FBgn0243511 | FBgn0266053 | FBgn0260660 |             |
| FBgn0250785 | FBgn0266268 | FBgn0263219 |             |
| FBgn0250814 | FBgn0266284 | FBgn0263256 |             |
| FBgn0250868 | FBgn0266409 | FBgn0264907 |             |
| FBgn0259152 | FBgn0266411 | FBgn0266099 |             |
| FBgn0259170 | FBgn0266581 | FBgn0267796 |             |
| FBgn0259481 | FBgn0266668 | FBgn0285963 |             |
| FBgn0259711 | FBgn0266673 | FBgn0000037 |             |
| FBgn0259742 | FBgn0266674 | FBgn0002576 |             |
| FBgn0259821 | FBgn0266696 | FBgn0002645 |             |
| FBgn0259832 | FBgn0266717 | FBgn0002783 |             |
| FBgn0259937 | FBgn0266722 | FBgn0002930 |             |
| FBgn0259984 | FBgn0266723 | FBgn0003285 |             |
| FBgn0260012 | FBgn0267350 | FBgn0003751 |             |
| FBgn0260442 | FBgn0267385 | FBgn0005626 |             |
| FBgn0260456 | FBgn0267976 | FBgn0019990 |             |
| FBgn0260632 | FBgn0270926 | FBgn0027505 |             |
| FBgn0260648 | FBgn0283427 | FBgn0028888 |             |
| FBgn0260745 | FBgn0283468 | FBgn0029697 |             |
| FBgn0260755 | FBgn0283472 | FBgn0030438 |             |
| FBgn0260855 | FBgn0283473 | FBgn0030693 |             |
| FBgn0260857 | FBgn0283510 | FBgn0030882 |             |
| FBgn0260965 | FBgn0283659 | FBgn0030960 |             |
| FBgn0260990 | FBgn0283680 | FBgn0030983 |             |
| FBgn0261020 | FBgn0283681 | FBgn0031227 |             |
| FBgn0261049 | FBgn0283724 | FBgn0031728 |             |
| FBgn0261068 | FBgn0283741 | FBgn0031857 |             |
| FBgn0261258 | FBgn0284245 | FBgn0031888 |             |
| FBgn0261274 | FBgn0284246 | FBgn0032139 |             |
| FBgn0261276 | FBgn0284248 | FBgn0032258 |             |
| FBgn0261285 | FBgn0284252 | FBgn0032259 |             |
| FBgn0261286 | FBgn0285911 | FBgn0032645 |             |
| FBgn0261380 | FBgn0285954 | FBgn0032969 |             |
| FBgn0261444 | FBgn0285955 | FBgn0033190 |             |
| FBgn0261530 | FBgn0285962 | FBgn0033696 |             |
| FBgn0261535 | FBgn0286075 | FBgn0033697 |             |
| FBgn0261550 | FBgn0286786 | FBgn0033725 |             |
| FBgn0261554 | FBgn0286813 | FBgn0033888 |             |
| FBgn0261560 | FBgn0286898 | FBgn0035281 |             |
| FBgn0261565 | FBgn0287225 | FBgn0035383 |             |
| FBgn0261574 | FBgn0287478 | FBgn0036018 |             |
| FBgn0261596 | FBgn0287631 | FBgn0036512 |             |
| FBgn0261599 | FBgn0287774 | FBgn0036597 |             |
| FBgn0261602 | FBgn0288310 | FBgn0036665 |             |
| FBgn0261800 | FBgn0000326 | FBgn0036970 |             |
| FBgn0261931 | FBgn0002069 | FBgn0038660 |             |
| FBgn0261933 | FBgn0003507 | FBgn0038680 |             |
| FBgn0261934 | FBgn0017581 | FBgn0039494 |             |

## Appendix Table S3. Genes upregulated in Lint-O KD

|             |             |              |             |             |             |             |             |             |             |
|-------------|-------------|--------------|-------------|-------------|-------------|-------------|-------------|-------------|-------------|
| FBgn0000046 | FBgn0014930 | FBgn00229911 | FBgn0031844 | FBgn0033453 | FBgn0035959 | FBgn0038038 | FBgn0041205 | FBgn0058298 | FBgn0263258 |
| FBgn0000053 | FBgn0014931 | FBgn00229924 | FBgn0031874 | FBgn0033468 | FBgn0035968 | FBgn0038042 | FBgn0041706 | FBgn0062413 | FBgn0263355 |
| FBgn0000084 | FBgn0015520 | FBgn0029970  | FBgn0031886 | FBgn0033555 | FBgn0036004 | FBgn0038045 | FBgn0042178 | FBgn0065032 | FBgn0263395 |
| FBgn0000108 | FBgn0015558 | FBgn0029974  | FBgn0031896 | FBgn0033584 | FBgn0036106 | FBgn0038053 | FBgn0042185 | FBgn0083956 | FBgn0263601 |
| FBgn0000158 | FBgn0015801 | FBgn0029975  | FBgn0031905 | FBgn0033627 | FBgn0036121 | FBgn0038105 | FBgn0043792 | FBgn0083962 | FBgn0263974 |
| FBgn0000246 | FBgn0015924 | FBgn0029977  | FBgn0031910 | FBgn0033683 | FBgn0036133 | FBgn0038191 | FBgn0043884 | FBgn0085223 | FBgn0264089 |
| FBgn0000299 | FBgn0015926 | FBgn0030011  | FBgn0031952 | FBgn0033686 | FBgn0036144 | FBgn0038250 | FBgn0045064 | FBgn0085317 | FBgn0264305 |
| FBgn0000317 | FBgn0016036 | FBgn0030099  | FBgn0031968 | FBgn0033715 | FBgn0036147 | FBgn0038252 | FBgn0046258 | FBgn0085425 | FBgn0264324 |
| FBgn0000346 | FBgn0016075 | FBgn0030114  | FBgn0031975 | FBgn0033748 | FBgn0036206 | FBgn0038273 | FBgn0046763 | FBgn0085428 | FBgn0264326 |
| FBgn0000414 | FBgn0016122 | FBgn0030189  | FBgn0031986 | FBgn0033749 | FBgn0036271 | FBgn0038277 | FBgn0046878 | FBgn0085438 | FBgn0264832 |
| FBgn0000422 | FBgn0017577 | FBgn0030207  | FBgn0031998 | FBgn0033767 | FBgn0036272 | FBgn0038299 | FBgn0050015 | FBgn0085440 | FBgn0264897 |
| FBgn0000533 | FBgn0019985 | FBgn0030245  | FBgn0032006 | FBgn0033785 | FBgn0036279 | FBgn0038311 | FBgn0050016 | FBgn0085446 | FBgn0264953 |
| FBgn0000557 | FBgn0020257 | FBgn0030266  | FBgn0032013 | FBgn0033799 | FBgn0036330 | FBgn0038312 | FBgn0050069 | FBgn0086254 | FBgn0265182 |
| FBgn0000615 | FBgn0020312 | FBgn0030274  | FBgn0032029 | FBgn0033807 | FBgn0036368 | FBgn0038318 | FBgn0050085 | FBgn0086690 | FBgn0265262 |
| FBgn0000644 | FBgn0020372 | FBgn0030290  | FBgn0032078 | FBgn0033814 | FBgn0036374 | FBgn0038349 | FBgn0050091 | FBgn0086691 | FBgn0265523 |
| FBgn0000966 | FBgn0020385 | FBgn0030347  | FBgn0032079 | FBgn0033876 | FBgn0036381 | FBgn0038419 | FBgn0050195 | FBgn0086898 | FBgn0265575 |
| FBgn0001120 | FBgn0020389 | FBgn0030357  | FBgn0032117 | FBgn0033913 | FBgn0036405 | FBgn0038431 | FBgn0050296 | FBgn0086909 | FBgn0265725 |
| FBgn0001222 | FBgn0020513 | FBgn0030362  | FBgn0032120 | FBgn0033921 | FBgn0036503 | FBgn0038463 | FBgn0050344 | FBgn0087002 | FBgn0266083 |
| FBgn0001224 | FBgn0021776 | FBgn0030396  | FBgn0032123 | FBgn0033960 | FBgn0036612 | FBgn0038465 | FBgn0050380 | FBgn0087035 | FBgn0266101 |
| FBgn0001225 | FBgn0022160 | FBgn0030412  | FBgn0032161 | FBgn0033987 | FBgn0036622 | FBgn0038490 | FBgn0050383 | FBgn0250788 | FBgn0266418 |
| FBgn0001226 | FBgn0022702 | FBgn0030432  | FBgn0032167 | FBgn0034013 | FBgn0036640 | FBgn0038540 | FBgn0050403 | FBgn0250789 | FBgn0266421 |
| FBgn0001229 | FBgn0022768 | FBgn0030457  | FBgn0032192 | FBgn0034067 | FBgn0036652 | FBgn0038550 | FBgn0050414 | FBgn0250848 | FBgn0266521 |
| FBgn0001230 | FBgn0022774 | FBgn0030478  | FBgn0032211 | FBgn0034075 | FBgn0036663 | FBgn0038575 | FBgn0050424 | FBgn0259140 | FBgn0266557 |
| FBgn0001248 | FBgn0022981 | FBgn0030484  | FBgn0032213 | FBgn0034095 | FBgn0036689 | FBgn0038581 | FBgn0050438 | FBgn0259173 | FBgn0266717 |
| FBgn0001311 | FBgn0023023 | FBgn0030508  | FBgn0032219 | FBgn0034106 | FBgn0036698 | FBgn0038612 | FBgn0050440 | FBgn0259185 | FBgn0266719 |
| FBgn0002431 | FBgn0023094 | FBgn0030510  | FBgn0032221 | FBgn0034117 | FBgn0036764 | FBgn0038652 | FBgn0050441 | FBgn0259195 | FBgn0267002 |
| FBgn0002441 | FBgn0023172 | FBgn0030521  | FBgn0032228 | FBgn0034162 | FBgn0036773 | FBgn0038680 | FBgn0050466 | FBgn0259224 | FBgn0267339 |
| FBgn0002526 | FBgn0023458 | FBgn0030545  | FBgn0032233 | FBgn0034179 | FBgn0036801 | FBgn0038691 | FBgn0050484 | FBgn0259226 | FBgn0267348 |
| FBgn0002567 | FBgn0023537 | FBgn0030551  | FBgn0032249 | FBgn0034187 | FBgn0036810 | FBgn0038814 | FBgn0051002 | FBgn0259238 | FBgn0267792 |
| FBgn0002773 | FBgn0023540 | FBgn0030597  | FBgn0032294 | FBgn0034199 | FBgn0036813 | FBgn0038815 | FBgn0051021 | FBgn0259242 | FBgn0267828 |
| FBgn0002878 | FBgn0024150 | FBgn0030600  | FBgn0032364 | FBgn0034221 | FBgn0036824 | FBgn0038830 | FBgn0051053 | FBgn0259683 | FBgn0267967 |
| FBgn0002937 | FBgn0024177 | FBgn0030629  | FBgn0032402 | FBgn0034255 | FBgn0036849 | FBgn0038912 | FBgn0051072 | FBgn0259685 | FBgn0283427 |
| FBgn0002962 | FBgn0024320 | FBgn0030647  | FBgn0032428 | FBgn0034300 | FBgn0036896 | FBgn0038916 | FBgn0051075 | FBgn0259734 | FBgn0283440 |
| FBgn0003048 | FBgn0024366 | FBgn0030660  | FBgn0032447 | FBgn0034371 | FBgn0036927 | FBgn0038966 | FBgn0051125 | FBgn0259735 | FBgn0283442 |
| FBgn0003114 | FBgn0024836 | FBgn0030674  | FBgn0032452 | FBgn0034420 | FBgn0036942 | FBgn0038978 | FBgn0051140 | FBgn0259740 | FBgn0283509 |
| FBgn0003187 | FBgn0024841 | FBgn0030683  | FBgn0032456 | FBgn0034452 | FBgn0036956 | FBgn0039002 | FBgn0051141 | FBgn0259791 | FBgn0283545 |
| FBgn0003218 | FBgn0024913 | FBgn0030706  | FBgn0032475 | FBgn0034500 | FBgn0036969 | FBgn0039044 | FBgn0051217 | FBgn0259992 | FBgn0284408 |
| FBgn0003250 | FBgn0024984 | FBgn0030716  | FBgn0032519 | FBgn0034592 | FBgn0036980 | FBgn0039075 | FBgn0051248 | FBgn0260388 | FBgn0284442 |
| FBgn0003292 | FBgn0025382 | FBgn0030723  | FBgn0032520 | FBgn0034606 | FBgn0036994 | FBgn0039114 | FBgn0051321 | FBgn0260442 | FBgn0286222 |
| FBgn0003301 | FBgn0025641 | FBgn0030742  | FBgn0032598 | FBgn0034628 | FBgn0037023 | FBgn0039129 | FBgn0051344 | FBgn0260766 | FBgn0286785 |
| FBgn0003353 | FBgn0025686 | FBgn0030793  | FBgn0032668 | FBgn0034694 | FBgn0037046 | FBgn0039180 | FBgn0051373 | FBgn0260779 | FBgn0287186 |
| FBgn0003399 | FBgn0025837 | FBgn0030816  | FBgn0032680 | FBgn0034718 | FBgn0037050 | FBgn0039251 | FBgn0051431 | FBgn0260794 | FBgn0287695 |
| FBgn0003391 | FBgn0025885 | FBgn0030841  | FBgn0032713 | FBgn0034725 | FBgn0037063 | FBgn0039265 | FBgn0051516 | FBgn0260795 | FBgn0287725 |
| FBgn0003462 | FBgn0026059 | FBgn0030847  | FBgn0032727 | FBgn0034733 | FBgn0037086 | FBgn0039272 | FBgn0051619 | FBgn0260932 | FBgn0287873 |
| FBgn0003527 | FBgn0026148 | FBgn0030876  | FBgn0032752 | FBgn0034753 | FBgn0037092 | FBgn0039277 | FBgn0051636 | FBgn0260933 | FBgn0000075 |
| FBgn0003655 | FBgn0026176 | FBgn0030884  | FBgn0032779 | FBgn0034797 | FBgn0037107 | FBgn0039356 | FBgn0051658 | FBgn0260970 | FBgn0000927 |
| FBgn0003733 | FBgn0026239 | FBgn0030937  | FBgn0032788 | FBgn0034804 | FBgn0037142 | FBgn0039507 | FBgn0051674 | FBgn0261041 | FBgn0002778 |
| FBgn0003950 | FBgn0026263 | FBgn0030955  | FBgn0032798 | FBgn0034816 | FBgn0037183 | FBgn0039564 | FBgn0051718 | FBgn0261086 | FBgn0003028 |
| FBgn0004167 | FBgn0026374 | FBgn0030968  | FBgn0032800 | FBgn0034850 | FBgn0037234 | FBgn0039622 | FBgn0051720 | FBgn0261243 | FBgn0003046 |
| FBgn0004360 | FBgn0026874 | FBgn0030994  | FBgn0032813 | FBgn0034880 | FBgn0037239 | FBgn0039640 | FBgn0051789 | FBgn0261260 | FBgn0003149 |
| FBgn0004400 | FBgn0027280 | FBgn0031053  | FBgn0032815 | FBgn0034935 | FBgn0037254 | FBgn0039644 | FBgn0051989 | FBgn0261261 | FBgn0003162 |
| FBgn0004432 | FBgn0027491 | FBgn0031091  | FBgn0032817 | FBgn0034950 | FBgn0037296 | FBgn0039666 | FBgn0051999 | FBgn0261262 | FBgn0003174 |
| FBgn0004449 | FBgn0027500 | FBgn0031097  | FBgn0032820 | FBgn0034988 | FBgn0037315 | FBgn0039688 | FBgn0052068 | FBgn0261363 | FBgn0003396 |
| FBgn0004581 | FBgn0027552 | FBgn0031104  | FBgn0032821 | FBgn0035035 | FBgn0037338 | FBgn0039702 | FBgn0052088 | FBgn0261397 | FBgn0003447 |
| FBgn0004611 | FBgn0027560 | FBgn0031116  | FBgn0032864 | FBgn0035073 | FBgn0037354 | FBgn0039714 | FBgn0052177 | FBgn0261445 | FBgn0003719 |
| FBgn0004647 | FBgn0027570 | FBgn0031117  | FBgn0032881 | FBgn0035113 | FBgn0037364 | FBgn0039752 | FBgn0052195 | FBgn0261547 | FBgn0004047 |
| FBgn0004650 | FBgn0027580 | FBgn0031161  | FBgn0032884 | FBgn0035151 | FBgn0037436 | FBgn0039755 | FBgn0052280 | FBgn0261574 | FBgn0010222 |
| FBgn0004882 | FBgn0027600 | FBgn0031170  | FBgn0032889 | FBgn0035167 | FBgn0037465 | FBgn0039774 | FBgn0052313 | FBgn0261617 | FBgn0010263 |
| FBgn0004885 | FBgn0028379 | FBgn0031171  | FBgn0032907 | FBgn0035169 | FBgn0037513 | FBgn0039827 | FBgn0052365 | FBgn0261671 | FBgn0013767 |
| FBgn0005558 | FBgn0028408 | FBgn0031191  | FBgn0032955 | FBgn0035265 | FBgn0037562 | FBgn0039863 | FBgn0052368 | FBgn0261794 | FBgn0014018 |
| FBgn0005631 | FBgn0028525 | FBgn0031228  | FBgn0032957 | FBgn0035287 | FBgn0037579 | FBgn0039883 | FBgn0052373 | FBgn0261797 | FBgn0015569 |
| FBgn0005633 | FBgn0028540 | FBgn0031232  | FBgn0032986 | FBgn0035308 | FBgn0037581 | FBgn0039896 | FBgn0052436 | FBgn0261802 | FBgn0016977 |
| FBgn0005660 | FBgn0028546 | FBgn0031239  | FBgn0033020 | FBgn0035321 | FBgn0037623 | FBgn0039900 | FBgn0052451 | FBgn0261836 | FBgn0024189 |
| FBgn0010014 | FBgn0028563 | FBgn0031245  | FBgn0033031 | FBgn0035356 | FBgn0037654 | FBgn0039908 | FBgn0052457 | FBgn0261955 | FBgn0025616 |
| FBgn0010051 | FBgn0028579 | FBgn0031254  | FBgn0033033 | FBgn0035407 | FBgn0037664 | FBgn0039916 | FBgn0052476 | FBgn0261985 | FBgn0025702 |
| FBgn0010097 | FBgn0028670 | FBgn0031263  | FBgn0033048 | FBgn0035410 | FBgn0037669 | FBgn0040009 | FBgn0052483 | FBgn0261987 | FBgn0025878 |
| FBgn0010226 | FBgn0028671 | FBgn0031264  | FBgn0033101 | FBgn0035445 | FBgn0037690 | FBgn0040102 | FBgn0052485 | FBgn0262101 | FBgn0028061 |
| FBgn0010246 | FBgn0028916 | FBgn0031313  | FBgn0033159 | FBgn0035452 | FBgn0037721 | FBgn0040212 | FBgn0052506 | FBgn0262123 | FBgn0028439 |
| FBgn0010317 | FBgn0028983 | FBgn0031315  | FBgn0033174 | FBgn0035477 | FBgn0037736 | FBgn0040308 | FBgn0052557 | FBgn0262364 | FBgn0026721 |
| FBgn0010406 | FBgn0028984 | FBgn0031317  | FBgn0033177 | FBgn0035515 | FBgn0037747 | FBgn0040321 | FBgn0052579 | FBgn0262562 | FBgn0027111 |
| FBgn0010407 | FBgn0028996 | FBgn0031384  | FBgn0033188 | FBgn0035521 | FBgn0037749 | FBgn0040322 | FBgn0052625 | FBgn0262563 | FBgn0027596 |
| FBgn0010482 | FBgn0029105 | FBgn0031413  | FBgn0033199 | FBgn0035523 | FBgn0037754 | FBgn0040323 | FBgn0052626 | FBgn0262599 | FBgn0027611 |
| FBgn0011206 | FBgn0029131 | FBgn0031451  | FBgn0033204 | FBgn0035575 | FBgn0037759 | FBgn0040333 | FBgn0052706 | FBgn0262614 | FBgn0028491 |
| FBgn0011230 | FBgn0029147 | FBgn0031489  | FBgn0033214 | FBgn0035578 | FBgn0037781 | FBgn0040348 | FBgn0053017 | FBgn0262686 | FBgn0028899 |
| FBgn0011286 | FBgn0029507 | FBgn0031490  | FBgn0033215 | FBgn0035587 | FBgn0037844 | FBgn0040382 | FBgn0053087 | FBgn0262719 | FBgn0028979 |
| FBgn0011293 | FBgn0029514 | FBgn0031520  | FBgn0033261 | FBgn0035623 | FBgn0037846 | FBgn0040384 | FBgn0053108 | FBgn0262738 | FBgn0030001 |
| FBgn0011606 | FBgn0029573 | FBgn0031609  | FBgn0033274 | FBgn0035677 | FBgn0037849 | FBgn0040465 | FBgn0053156 | FBgn0262782 | FBgn0030085 |
| FBgn0011704 | FBgn0029685 | FBgn0031630  | FBgn0033312 | FBgn0035724 | FBgn0037853 | FBgn0040491 | FBgn0053289 | FBgn0262820 | FBgn0030367 |
| FBgn0011705 | FBgn0029694 | FBgn0031636  | FBgn0033373 | FBgn0035751 | FBgn0037885 | FBgn0040507 | FBgn0053469 | FBgn0262985 | FBgn0030890 |
| FBgn0012037 | FBgn0029708 | FBgn0031637  | FBgn0033374 | FBgn0035761 | FBgn0037896 | FBgn0040524 | FBgn0053494 | FBgn0263022 | FBgn0030993 |
| FBgn0013733 | FBgn0029712 | FBgn0031646  | FBgn0033381 | FBgn0035767 | FBgn0037897 | FBgn0040551 | FBgn0053558 | FBgn0263023 | FBgn0030998 |
| FBgn0013763 | FBgn0029723 | FBgn0031677  | FBgn0033388 | FBgn0035770 | FBgn0037921 | FBgn0040670 | FBgn0053653 | FBgn0263029 | FBgn0031195 |
| FBgn0013773 | FBgn0029754 | FBgn0031717  | FBgn0033431 | FBgn0035847 | FBgn0037944 | FBgn0040752 | FBgn0053679 | FBgn0263076 | FBgn0031240 |
| FBgn0013810 | FBgn0029765 | FBgn0031740  | FBgn0033438 | FBgn0035896 | FBgn0037950 | FBgn0040759 | FBgn0053792 | FBgn0263143 | FBgn0031414 |
| FBgn0013981 | FBgn0029830 | FBgn0031762  | FBgn0033446 | FBgn0035907 | FBgn0037972 | FBgn0040823 | FBgn0053926 |             |             |

|             |             |             |             |
|-------------|-------------|-------------|-------------|
| FBgn0032040 | FBgn0259108 | FBgn0031887 | FBgn0038260 |
| FBgn0032055 | FBgn0259216 | FBgn0031920 | FBgn0038261 |
| FBgn0032218 | FBgn0260874 | FBgn0031974 | FBgn0038315 |
| FBgn0032345 | FBgn0261016 | FBgn0032003 | FBgn0038407 |
| FBgn0032726 | FBgn0261859 | FBgn0032082 | FBgn0038435 |
| FBgn0032749 | FBgn0261996 | FBgn0032178 | FBgn0038492 |
| FBgn0033096 | FBgn0262057 | FBgn0032225 | FBgn0038530 |
| FBgn0033110 | FBgn0262477 | FBgn0032252 | FBgn0038761 |
| FBgn0033203 | FBgn0262509 | FBgn0032253 | FBgn0038957 |
| FBgn0033222 | FBgn0262531 | FBgn0032262 | FBgn0039006 |
| FBgn0033246 | FBgn0262867 | FBgn0032374 | FBgn0039124 |
| FBgn0033657 | FBgn0262871 | FBgn0032375 | FBgn0039282 |
| FBgn0033904 | FBgn0263111 | FBgn0032422 | FBgn0039294 |
| FBgn0033963 | FBgn0263219 | FBgn0032601 | FBgn0039321 |
| FBgn0034052 | FBgn0264815 | FBgn0032683 | FBgn0039504 |
| FBgn0034094 | FBgn0264895 | FBgn0032774 | FBgn0039629 |
| FBgn0034247 | FBgn0265045 | FBgn0032783 | FBgn0039655 |
| FBgn0034489 | FBgn0265052 | FBgn0032803 | FBgn0039678 |
| FBgn0034497 | FBgn0265274 | FBgn0032900 | FBgn0039818 |
| FBgn0034706 | FBgn0266129 | FBgn0032972 | FBgn0039911 |
| FBgn0034943 | FBgn0266709 | FBgn0032973 | FBgn0039915 |
| FBgn0034966 | FBgn0284435 | FBgn0033051 | FBgn0039927 |
| FBgn0034974 | FBgn0000146 | FBgn0033079 | FBgn0040370 |
| FBgn0034985 | FBgn0000153 | FBgn0033113 | FBgn0041233 |
| FBgn0035034 | FBgn0001259 | FBgn0033115 | FBgn0041710 |
| FBgn0035094 | FBgn0001296 | FBgn0033221 | FBgn0042696 |
| FBgn0035103 | FBgn0001991 | FBgn0033234 | FBgn0043043 |
| FBgn0035234 | FBgn0003137 | FBgn0033268 | FBgn0043575 |
| FBgn0035264 | FBgn0003308 | FBgn0033387 | FBgn0043806 |
| FBgn0035505 | FBgn0003475 | FBgn0033658 | FBgn0045980 |
| FBgn0035612 | FBgn0003486 | FBgn0033659 | FBgn0050345 |
| FBgn0035903 | FBgn0003886 | FBgn0033753 | FBgn0050485 |
| FBgn0036195 | FBgn0003890 | FBgn0033763 | FBgn0051017 |
| FBgn0036282 | FBgn0004118 | FBgn0033875 | FBgn0051370 |
| FBgn0036479 | FBgn0004512 | FBgn0033917 | FBgn0051436 |
| FBgn0036568 | FBgn0005427 | FBgn0034047 | FBgn0051463 |
| FBgn0036727 | FBgn0005666 | FBgn0034279 | FBgn0051464 |
| FBgn0036806 | FBgn0010241 | FBgn0034413 | FBgn0051997 |
| FBgn0036875 | FBgn0010258 | FBgn0034530 | FBgn0052006 |
| FBgn0036978 | FBgn0010473 | FBgn0034538 | FBgn0052037 |
| FBgn0036993 | FBgn0011296 | FBgn0034602 | FBgn0052073 |
| FBgn0037276 | FBgn0011722 | FBgn0034662 | FBgn0052702 |
| FBgn0037618 | FBgn0011828 | FBgn0034789 | FBgn0052783 |
| FBgn0037714 | FBgn0013348 | FBgn0034928 | FBgn0053481 |
| FBgn0037717 | FBgn0013813 | FBgn0034956 | FBgn0053775 |
| FBgn0037750 | FBgn0014000 | FBgn0034957 | FBgn0058470 |
| FBgn0037751 | FBgn0014395 | FBgn0034972 | FBgn0065110 |
| FBgn0037916 | FBgn0014396 | FBgn0035056 | FBgn0069969 |
| FBgn0038076 | FBgn0014417 | FBgn0035104 | FBgn0085245 |
| FBgn0038079 | FBgn0015032 | FBgn0035286 | FBgn0085298 |
| FBgn0038290 | FBgn0015519 | FBgn0035317 | FBgn0085483 |
| FBgn0038330 | FBgn0020379 | FBgn0035412 | FBgn0087040 |
| FBgn0038602 | FBgn0022709 | FBgn0035434 | FBgn0250819 |
| FBgn0038740 | FBgn0023416 | FBgn0035571 | FBgn0250904 |
| FBgn0039201 | FBgn0023495 | FBgn0035880 | FBgn0250907 |
| FBgn0039415 | FBgn0024732 | FBgn0035904 | FBgn0259977 |
| FBgn0039500 | FBgn0026144 | FBgn0035985 | FBgn0260430 |
| FBgn0039594 | FBgn0026562 | FBgn0036040 | FBgn0260658 |
| FBgn0039651 | FBgn0026593 | FBgn0036131 | FBgn0260866 |
| FBgn0039789 | FBgn0027070 | FBgn0036168 | FBgn0261341 |
| FBgn0039886 | FBgn0027073 | FBgn0036208 | FBgn0261393 |
| FBgn0039897 | FBgn0027521 | FBgn0036454 | FBgn0261561 |
| FBgn0039932 | FBgn0027550 | FBgn0036547 | FBgn0262035 |
| FBgn0040091 | FBgn0028988 | FBgn0036575 | FBgn0262794 |
| FBgn0040096 | FBgn0029091 | FBgn0036687 | FBgn0264443 |
| FBgn0040372 | FBgn0029710 | FBgn0036738 | FBgn0264894 |
| FBgn0041234 | FBgn0029856 | FBgn0036752 | FBgn0265048 |
| FBgn0041723 | FBgn0029986 | FBgn0036765 | FBgn0265137 |
| FBgn0042133 | FBgn0029987 | FBgn0036890 | FBgn0265417 |
| FBgn0050502 | FBgn0030028 | FBgn0036891 | FBgn0265767 |
| FBgn0051161 | FBgn0030244 | FBgn0036910 | FBgn0266534 |
| FBgn0051202 | FBgn0030310 | FBgn0037028 | FBgn0266566 |
| FBgn0051231 | FBgn0030590 | FBgn0037060 | FBgn0267408 |
| FBgn0051279 | FBgn0030653 | FBgn0037222 | FBgn0285896 |
| FBgn0051706 | FBgn0030691 | FBgn0037225 | FBgn0287209 |
| FBgn0052036 | FBgn0030748 | FBgn0037304 |             |
| FBgn0053099 | FBgn0030859 | FBgn0037347 |             |
| FBgn0053257 | FBgn0031004 | FBgn0037375 |             |
| FBgn0053468 | FBgn0031018 | FBgn0037563 |             |
| FBgn0053519 | FBgn0031157 | FBgn0037659 |             |
| FBgn0061356 | FBgn0031184 | FBgn0037807 |             |
| FBgn0083960 | FBgn0031255 | FBgn0037835 |             |
| FBgn0085384 | FBgn0031343 | FBgn0037915 |             |
| FBgn0085421 | FBgn0031515 | FBgn0037934 |             |
| FBgn0085431 | FBgn0031548 | FBgn0037973 |             |
| FBgn0085434 | FBgn0031715 | FBgn0037974 |             |
| FBgn0086906 | FBgn0031716 | FBgn0037975 |             |
| FBgn0250816 | FBgn0031737 | FBgn0038017 |             |
| FBgn0250869 | FBgn0031869 | FBgn0038067 |             |

## Appendix Table S3. Genes downregulated in Lint-O KD

|             |             |             |             |             |             |             |             |             |
|-------------|-------------|-------------|-------------|-------------|-------------|-------------|-------------|-------------|
| FBgn0000116 | FBgn0011726 | FBgn0026666 | FBgn0031651 | FBgn0034447 | FBgn0036686 | FBgn0039419 | FBgn0261380 | FBgn0030983 |
| FBgn0000181 | FBgn0011737 | FBgn0027055 | FBgn0031660 | FBgn0034451 | FBgn0036702 | FBgn0039488 | FBgn0261535 | FBgn0031227 |
| FBgn0000250 | FBgn0011762 | FBgn0027057 | FBgn0031673 | FBgn0034494 | FBgn0036734 | FBgn0039602 | FBgn0261560 | FBgn0031805 |
| FBgn0000253 | FBgn0013269 | FBgn0027079 | FBgn0031710 | FBgn0034528 | FBgn0036754 | FBgn0039626 | FBgn0261565 | FBgn0031857 |
| FBgn0000261 | FBgn0013432 | FBgn0027081 | FBgn0031736 | FBgn0034534 | FBgn0036805 | FBgn0039636 | FBgn0261596 | FBgn0031888 |
| FBgn0000326 | FBgn0014020 | FBgn0027082 | FBgn0031832 | FBgn0034579 | FBgn0036828 | FBgn0039654 | FBgn0261599 | FBgn0033592 |
| FBgn0000370 | FBgn0014028 | FBgn0027086 | FBgn0031851 | FBgn0034617 | FBgn0036838 | FBgn0039735 | FBgn0261822 | FBgn0033725 |
| FBgn0000395 | FBgn0014163 | FBgn0027088 | FBgn0031881 | FBgn0034631 | FBgn0036886 | FBgn0039740 | FBgn0261931 | FBgn0035158 |
| FBgn0000412 | FBgn0014366 | FBgn0027090 | FBgn0031902 | FBgn0034703 | FBgn0036892 | FBgn0039765 | FBgn0261933 | FBgn0035189 |
| FBgn0000426 | FBgn0014411 | FBgn0027091 | FBgn0031992 | FBgn0034724 | FBgn0036916 | FBgn0039828 | FBgn0261984 | FBgn0035281 |
| FBgn0000560 | FBgn0014877 | FBgn0027094 | FBgn0032016 | FBgn0034741 | FBgn0036973 | FBgn0039868 | FBgn0262081 | FBgn0035277 |
| FBgn0000579 | FBgn0015000 | FBgn0027330 | FBgn0032034 | FBgn0034792 | FBgn0037011 | FBgn0039909 | FBgn0262169 | FBgn0036597 |
| FBgn0001092 | FBgn0015024 | FBgn0027554 | FBgn0032050 | FBgn0034802 | FBgn0037012 | FBgn0039929 | FBgn0262527 | FBgn0037672 |
| FBgn0001139 | FBgn0015218 | FBgn0027556 | FBgn0032051 | FBgn0034858 | FBgn0037019 | FBgn0039993 | FBgn0262601 | FBgn0037941 |
| FBgn0001149 | FBgn0015221 | FBgn0027587 | FBgn0032101 | FBgn0034877 | FBgn0037051 | FBgn0040064 | FBgn0262732 | FBgn0040256 |
| FBgn0001168 | FBgn0015222 | FBgn0027599 | FBgn0032138 | FBgn0034914 | FBgn0037073 | FBgn0040066 | FBgn0262734 | FBgn0040259 |
| FBgn0001186 | FBgn0015229 | FBgn0027619 | FBgn0032198 | FBgn0034915 | FBgn0037081 | FBgn0040075 | FBgn0262736 | FBgn0040609 |
| FBgn0001202 | FBgn0015245 | FBgn0027785 | FBgn0032217 | FBgn0034918 | FBgn0037102 | FBgn0040271 | FBgn0262954 | FBgn0041087 |
| FBgn0001215 | FBgn0015268 | FBgn0027836 | FBgn0032222 | FBgn0034925 | FBgn0037137 | FBgn0040309 | FBgn0263133 | FBgn0042173 |
| FBgn0001218 | FBgn0015288 | FBgn0027932 | FBgn0032229 | FBgn0034982 | FBgn0037248 | FBgn0040319 | FBgn0263200 | FBgn0043841 |
| FBgn0001220 | FBgn0015527 | FBgn0028331 | FBgn0032236 | FBgn0035020 | FBgn0037293 | FBgn0040389 | FBgn0263396 | FBgn0051547 |
| FBgn0001247 | FBgn0015754 | FBgn0028341 | FBgn0032248 | FBgn0035027 | FBgn0037382 | FBgn0040394 | FBgn0263510 | FBgn0063491 |
| FBgn0001258 | FBgn0015765 | FBgn0028429 | FBgn0032258 | FBgn0035039 | FBgn0037391 | FBgn0040529 | FBgn0263594 | FBgn0259243 |
| FBgn0001301 | FBgn0015776 | FBgn0028473 | FBgn0032261 | FBgn0035063 | FBgn0037487 | FBgn0040985 | FBgn0263605 | FBgn0263118 |
| FBgn0001316 | FBgn0015778 | FBgn0028504 | FBgn0032296 | FBgn0035085 | FBgn0037489 | FBgn0041147 | FBgn0263740 | FBgn0264907 |
| FBgn0001341 | FBgn0015790 | FBgn0028527 | FBgn0032321 | FBgn0035121 | FBgn0037543 | FBgn0041184 | FBgn0263774 |             |
| FBgn0001961 | FBgn0015795 | FBgn0028690 | FBgn0032346 | FBgn0035131 | FBgn0037555 | FBgn0041210 | FBgn0263929 |             |
| FBgn0002031 | FBgn0015797 | FBgn0028744 | FBgn0032397 | FBgn0035137 | FBgn0037561 | FBgn0041604 | FBgn0264006 |             |
| FBgn0002413 | FBgn0015829 | FBgn0028836 | FBgn0032408 | FBgn0035165 | FBgn0037608 | FBgn0041629 | FBgn0264294 |             |
| FBgn0002576 | FBgn0016041 | FBgn0028919 | FBgn0032476 | FBgn0035173 | FBgn0037637 | FBgn0042693 | FBgn0265003 |             |
| FBgn0002780 | FBgn0016685 | FBgn0028990 | FBgn0032487 | FBgn0035205 | FBgn0037652 | FBgn0042712 | FBgn0265297 |             |
| FBgn0003206 | FBgn0016694 | FBgn0029117 | FBgn0032512 | FBgn0035213 | FBgn0037710 | FBgn0044323 | FBgn0265574 |             |
| FBgn0003231 | FBgn0016797 | FBgn0029133 | FBgn0032514 | FBgn0035232 | FBgn0037743 | FBgn0046214 | FBgn0265935 |             |
| FBgn0003257 | FBgn0017578 | FBgn0029664 | FBgn0032586 | FBgn0035295 | FBgn0037773 | FBgn0046685 | FBgn0266284 |             |
| FBgn0003274 | FBgn0019624 | FBgn0029672 | FBgn0032587 | FBgn0035336 | FBgn0037794 | FBgn0050000 | FBgn0266581 |             |
| FBgn0003275 | FBgn0020238 | FBgn0029689 | FBgn0032620 | FBgn0035337 | FBgn0037852 | FBgn0050035 | FBgn0266668 |             |
| FBgn0003278 | FBgn0020278 | FBgn0029755 | FBgn0032703 | FBgn0035346 | FBgn0037891 | FBgn0050104 | FBgn0266669 |             |
| FBgn0003310 | FBgn0020388 | FBgn0029766 | FBgn0032728 | FBgn0035357 | FBgn0037899 | FBgn0050159 | FBgn0266673 |             |
| FBgn0003360 | FBgn0020414 | FBgn0029785 | FBgn0032731 | FBgn0035383 | FBgn0037958 | FBgn0050349 | FBgn0266720 |             |
| FBgn0003495 | FBgn0020440 | FBgn0029878 | FBgn0032799 | FBgn0035393 | FBgn0038020 | FBgn0050476 | FBgn0267347 |             |
| FBgn0003512 | FBgn0020443 | FBgn0029887 | FBgn0032849 | FBgn0035422 | FBgn0038057 | FBgn0050493 | FBgn0267385 |             |
| FBgn0003525 | FBgn0020445 | FBgn0029894 | FBgn0032859 | FBgn0035425 | FBgn0038146 | FBgn0051111 | FBgn0267975 |             |
| FBgn0003660 | FBgn0020647 | FBgn0030037 | FBgn0032886 | FBgn0035438 | FBgn0038194 | FBgn0051223 | FBgn0268347 |             |
| FBgn0003714 | FBgn0021768 | FBgn0030052 | FBgn0032891 | FBgn0035440 | FBgn0038196 | FBgn0051361 | FBgn0268359 |             |
| FBgn0003748 | FBgn0021874 | FBgn0030060 | FBgn0032901 | FBgn0035462 | FBgn0038224 | FBgn0051363 | FBgn0268368 |             |
| FBgn0003885 | FBgn0021895 | FBgn0030061 | FBgn0032919 | FBgn0035488 | FBgn0038235 | FBgn0051852 | FBgn0268381 |             |
| FBgn0003888 | FBgn0021995 | FBgn0030067 | FBgn0032925 | FBgn0035519 | FBgn0038271 | FBgn0052066 | FBgn0268426 |             |
| FBgn0003984 | FBgn0022029 | FBgn0030177 | FBgn0032974 | FBgn0035524 | FBgn0038275 | FBgn0052103 | FBgn0268428 |             |
| FBgn0004050 | FBgn0022069 | FBgn0030208 | FBgn0032981 | FBgn0035541 | FBgn0038294 | FBgn0052176 | FBgn0268425 |             |
| FBgn0004177 | FBgn0022238 | FBgn0030291 | FBgn0032988 | FBgn0035589 | FBgn0038306 | FBgn0052267 | FBgn0268453 |             |
| FBgn0004359 | FBgn0022288 | FBgn0030321 | FBgn0033000 | FBgn0035591 | FBgn0038307 | FBgn0052344 | FBgn0268597 |             |
| FBgn0004465 | FBgn0022893 | FBgn0030364 | FBgn0033038 | FBgn0035600 | FBgn0038369 | FBgn0052409 | FBgn0268676 |             |
| FBgn0004556 | FBgn0022959 | FBgn0030479 | FBgn0033226 | FBgn0035603 | FBgn0038400 | FBgn0052418 | FBgn0268725 |             |
| FBgn0004635 | FBgn0022984 | FBgn0030482 | FBgn0033235 | FBgn0035630 | FBgn0038454 | FBgn0052533 | FBgn0268874 |             |
| FBgn0004638 | FBgn0023000 | FBgn0030569 | FBgn0033260 | FBgn0035656 | FBgn0038455 | FBgn0052649 | FBgn0000308 |             |
| FBgn0004657 | FBgn0023091 | FBgn0030588 | FBgn0033304 | FBgn0035714 | FBgn0038472 | FBgn0052672 | FBgn0002645 |             |
| FBgn0004828 | FBgn0023177 | FBgn0030598 | FBgn0033379 | FBgn0035760 | FBgn0038473 | FBgn0053100 | FBgn0005775 |             |
| FBgn0004901 | FBgn0023212 | FBgn0030603 | FBgn0033395 | FBgn0035805 | FBgn0038488 | FBgn0053158 | FBgn0014388 |             |
| FBgn0004907 | FBgn0023214 | FBgn0030605 | FBgn0033428 | FBgn0035853 | FBgn0038519 | FBgn0053180 | FBgn0024183 |             |
| FBgn0004926 | FBgn0023514 | FBgn0030608 | FBgn0033454 | FBgn0035866 | FBgn0038585 | FBgn0053329 | FBgn0026160 |             |
| FBgn0005278 | FBgn0023519 | FBgn0030672 | FBgn0033483 | FBgn0035877 | FBgn0038593 | FBgn0053542 | FBgn0026319 |             |
| FBgn0005616 | FBgn0023527 | FBgn0030687 | FBgn0033485 | FBgn0035878 | FBgn0038666 | FBgn0062449 | FBgn0028541 |             |
| FBgn0005648 | FBgn0023542 | FBgn0030692 | FBgn0033507 | FBgn0035901 | FBgn0038678 | FBgn0065339 | FBgn0029896 |             |
| FBgn0005672 | FBgn0024245 | FBgn0030720 | FBgn0033540 | FBgn0036000 | FBgn0038742 | FBgn0066347 | FBgn0030318 |             |
| FBgn0010038 | FBgn0024321 | FBgn0030752 | FBgn0033544 | FBgn0036018 | FBgn0038746 | FBgn0066443 | FBgn0030870 |             |
| FBgn0010173 | FBgn0024362 | FBgn0030850 | FBgn0033547 | FBgn0036035 | FBgn0038768 | FBgn0066656 | FBgn0032640 |             |
| FBgn0010220 | FBgn0024364 | FBgn0030853 | FBgn0033548 | FBgn0036038 | FBgn0038787 | FBgn0066711 | FBgn0035023 |             |
| FBgn0010235 | FBgn0024556 | FBgn0030854 | FBgn0033571 | FBgn0036124 | FBgn0038854 | FBgn0066855 | FBgn0035049 |             |
| FBgn0010238 | FBgn0024993 | FBgn0030863 | FBgn0033649 | FBgn0036126 | FBgn0038869 | FBgn0066904 | FBgn0035101 |             |
| FBgn0010278 | FBgn0025366 | FBgn0030894 | FBgn0033737 | FBgn0036173 | FBgn0038890 | FBgn0066912 | FBgn0035470 |             |
| FBgn0010333 | FBgn0025394 | FBgn0030904 | FBgn0033741 | FBgn0036187 | FBgn0038893 | FBgn0067085 | FBgn0036316 |             |
| FBgn0010340 | FBgn0025582 | FBgn0030969 | FBgn0033816 | FBgn0036207 | FBgn0038964 | FBgn0067152 | FBgn0039257 |             |
| FBgn0010348 | FBgn0025608 | FBgn0031040 | FBgn0033907 | FBgn0036237 | FBgn0038989 | FBgn0067548 | FBgn0039829 |             |
| FBgn0010389 | FBgn0025674 | FBgn0031043 | FBgn0033918 | FBgn0036258 | FBgn0039004 | FBgn0067911 | FBgn0039858 |             |
| FBgn0010409 | FBgn0025781 | FBgn0031047 | FBgn0033989 | FBgn0036333 | FBgn0039109 | FBgn0067942 | FBgn0025073 |             |
| FBgn0010504 | FBgn0025809 | FBgn0031057 | FBgn0034029 | FBgn0036334 | FBgn0039175 | FBgn0067982 | FBgn0263256 |             |
| FBgn0010551 | FBgn0025830 | FBgn0031114 | FBgn0034049 | FBgn0036500 | FBgn0039205 | FBgn0068978 | FBgn0265963 |             |
| FBgn0010611 | FBgn0025832 | FBgn0031238 | FBgn0034065 | FBgn0036512 | FBgn0039207 | FBgn0068997 | FBgn0266051 |             |
| FBgn0010651 | FBgn0025879 | FBgn0031281 | FBgn0034086 | FBgn0036514 | FBgn0039223 | FBgn0069047 | FBgn0000037 |             |
| FBgn0010770 | FBgn0026079 | FBgn0031321 | FBgn0034113 | FBgn0036516 | FBgn0039252 | FBgn0069056 | FBgn0002783 |             |
| FBgn0010774 | FBgn0026084 | FBgn0031392 | FBgn0034118 | FBgn0036522 | FBgn0039259 | FBgn0069063 | FBgn0003285 |             |
| FBgn0010786 | FBgn0026196 | FBgn0031456 | FBgn0034232 | FBgn0036570 | FBgn0039274 | FBgn0069064 | FBgn0004034 |             |
| FBgn0010803 | FBgn0026250 | FBgn0031493 | FBgn0034243 | FBgn0036580 | FBgn0039303 | FBgn0069075 | FBgn0004436 |             |
| FBgn0010808 | FBgn0026252 | FBgn0031500 | FBgn0034259 | FBgn0036614 | FBgn0039306 | FBgn0069085 | FBgn0015037 |             |
| FBgn0010926 | FBgn0026317 | FBgn0031540 | FBgn0034345 | FBgn0036627 | FBgn0039350 | FBgn0069093 | FBgn0022349 |             |
| FBgn0011204 | FBgn0026372 | FBgn0031597 | FBgn0034401 | FBgn0036661 | FBgn0039358 | FBgn0069125 | FBgn0029804 |             |
| FBgn0011638 | FBgn0026378 | FBgn0031643 | FBgn0034432 | FBgn0036666 | FBgn0039407 | FBgn0069126 | FBgn0030373 |             |

| <b>Appendix table S4</b>                                                     |                                                                                                                |
|------------------------------------------------------------------------------|----------------------------------------------------------------------------------------------------------------|
| Related to Figs 5-6 and Figs EV5. Experimental genotypes used in this study. |                                                                                                                |
| <b>Fig 5B-5E</b>                                                             |                                                                                                                |
| <i>yw</i>                                                                    | $y^1 w^{1118}$                                                                                                 |
| <i>Lint-O<sup>KO</sup></i>                                                   | $y^1 w^{1118} Lint-O^{KO} / y^1 w^{1118} Lint-O^{KO}$                                                          |
| <b>Fig 6A, 6B, 6D-6G</b>                                                     |                                                                                                                |
| <i>yw</i>                                                                    | $y^1 w^{1118},$<br>$y^1 w^{1118} / Y$                                                                          |
| <i>Lint-O<sup>KO</sup></i>                                                   | $y^1 w^{1118} Lint-O^{KO} / y^1 w^{1118} Lint-O^{KO},$<br>$y^1 w^{1118} Lint-O^{KO} / Y$                       |
| <i>L(3)mbt<sup>ts1</sup></i>                                                 | $w^* ; + ; L(3)mbt^{ts1} / L(3)mbt^{ts1},$<br>$w^* / Y ; + ; L(3)mbt^{ts1} / L(3)mbt^{ts1}$                    |
| <b>Fig 6C</b>                                                                |                                                                                                                |
| <i>Lint-O<sup>KO</sup> -/+</i>                                               | $y^1 w^{1118} Lint-O^{KO} / FM7 Kruppel>GFP,$<br>$FM7 Kruppel>GFP / FM7 Kruppel>GFP,$<br>$FM7 Kruppel>GFP / Y$ |
| <i>Lint-O<sup>KO</sup> -/-</i>                                               | $y^1 w^{1118} Lint-O^{KO} / y^1 w^{1118} Lint-O^{KO},$<br>$y^1 w^{1118} Lint-O^{KO} / Y$                       |
| <i>L(3)mbt<sup>ts1</sup> -/-</i>                                             | $w^* ; + ; L(3)mbt^{ts1} / L(3)mbt^{ts1},$<br>$w^* / Y ; + ; L(3)mbt^{ts1} / L(3)mbt^{ts1}$                    |
| <b>Fig EV5</b>                                                               |                                                                                                                |
| <i>yw</i>                                                                    | $y^1 w^{1118},$<br>$y^1 w^{1118} / Y$                                                                          |
| <i>Lint-O<sup>KO</sup></i>                                                   | $y^1 w^{1118} Lint-O^{KO} / y^1 w^{1118} Lint-O^{KO},$<br>$y^1 w^{1118} Lint-O^{KO} / Y$                       |
| <i>L(3)mbt<sup>ts1</sup></i>                                                 | $w^* ; + ; L(3)mbt^{ts1} / L(3)mbt^{ts1},$<br>$w^* / Y ; + ; L(3)mbt^{ts1} / L(3)mbt^{ts1}$                    |
| <i>yw Lint-O-Venus</i>                                                       | $y^1 w^{1118} Lint-O-Venus / y^1 w^{1118} Lint-O-Venus$                                                        |
